# Supplementary material
Source: PubMed Central journal article supplement (PMC5387673)
Supplement: pr6b01003_si_001.pdf [file pr6b01003_si_001.pdf]

## Supporting Information

### Optimization and application of direct infusion nanoelectrospray HRMS method for large-scale urinary metabolic phenotyping in molecular epidemiology

*Elena Chekmeneva<sup>a\*</sup>, Gonçalo dos Santos Correia<sup>a</sup>, Queenie Chan<sup>b,c</sup>, Anisha Wijeyesekera<sup>a</sup>, Adrienne Tin<sup>e</sup>, Jeffery Hunter Young<sup>e</sup>, Paul Elliott<sup>b,c,d</sup>, Jeremy K. Nicholson<sup>a,d</sup>, and Elaine Holmes<sup>a,d\*</sup>*

<sup>a</sup> Biomolecular Medicine, Department of Surgery and Cancer, Faculty of Medicine, Imperial College London, South Kensington, London SW7 2AZ, United Kingdom

<sup>b</sup> Department of Epidemiology and Biostatistics, School of Public Health, Faculty of Medicine, Imperial College London, London W2 1PG, United Kingdom

<sup>c</sup> MRC-PHE Centre for Environment and Health, Imperial College London, London W2 1PG, United Kingdom

<sup>d</sup> MRC-NIHR National Phenome Centre, London SW7 2AZ, United Kingdom

<sup>e</sup> Department of Medicine, Johns Hopkins University, School of Medicine, Baltimore, Maryland 21287, United States

**\* Corresponding authors: Dr Elena Chekmeneva (email: [e.chekmeneva@imperial.ac.uk](mailto:e.chekmeneva@imperial.ac.uk)) and Prof Elaine Holmes (e-mail: [elaine.holmes@imperial.ac.uk](mailto:elaine.holmes@imperial.ac.uk))**

#### Table of content:

|                                                         |      |
|---------------------------------------------------------|------|
| Material and Methods.....                               | S-2  |
| 1. Materials and preparation of standard solutions..... | S-2  |
| 2. Chip based nanoelectrospray MS system.....           | S-2  |
| 3. Synthetic Test Mixture (TM).....                     | S-3  |
| Results and Discussion .....                            | S-4  |
| 1. Parallel assay.....                                  | S-4  |
| 2. Analysis of Test Mixture (TM).....                   | S-4  |
| Supplementary Tables.....                               | S-6  |
| Supplementary Figures.....                              | S-21 |
| Supplementary References.....                           | S-33 |

## Materials and methods

### 1. Materials and preparation of standard solutions

All chemicals and solvents were of the highest purity grade. Labelled and non-labelled standards used for quantification (See Table S1 for details) were purchased from Sigma-Aldrich (Isotec, Gillingham, UK), CK Isotope (Cambridge Isotope Laboratories, Ibstock, UK), ALSA CHIM (Illkirch, France), Biozol (Eching, Germany), TCI-UK (Oxford, UK), Alfa Aesar, TOCRIS (Bristol, UK), and Acros Organics. Ultrapure HPLC-grade methanol and water were purchased from Sigma-Aldrich (Gillingham, UK).

The standard stock solutions were prepared taking into account all specifications of chemical purity and isotopic enrichment for labelled standards. For the most part, the labelled standard solutions were additionally prepared in deuterated methanol and assessed by  $^1\text{H}$  NMR for signs of chemical degradation with a time interval of two months corresponding to the time required to complete the analysis of >10000 urine samples from the INTERMAP study.  $^1\text{H}$  NMR spectra of labelled glutamic acid- $\text{d}_5$  and proline betaine- $^{13}\text{C}_2$  are shown in the Figure S-2. For the deuterated standards showing unstable behaviour fresh stock solutions were prepared weekly. Generally, the use of  $^{13}\text{C}$  and  $^{15}\text{N}$  isotope-labelled standards is preferential to deuterated standards in targeted analysis because the latter can interfere with the signal of targeted compound.<sup>1</sup> The stock solutions of the labelled and non-labelled standards were stored at 4 °C in tightly closed containers.

For the preparation of analyte-free matrix in the INTERMAP study, sodium borate solution in ultrapure HPLC-grade water at concentration of 10 g/L (as in the standard procedure for urine sample collection and storage in the INTERMAP project) was diluted 50 times to obtain similar borate concentration as expected in diluted urine samples. For the ARIC study, water with 0.01% of formic acid was used as an analyte-free matrix.

### 2. Chip based nanoelectrospray MS system

The nanoelectrospray was created and maintained by applying 1.4 kV high voltage and 0.8 psi nitrogen flow controlled by ChipSoft software (version 8.3.1). The sample plate temperature was maintained at 4 °C. The data were collected in high resolution continuum mode with the scan time of 1 s over the mass range of 40 – 600 m/z in negative and positive ion modes with automatic polarity switch infusing 5  $\mu\text{L}$  of a sample. The sampling cone voltage was set at 40 V, and the source offset at 80 V.

Total data acquisition time was of 40 s for the INTERMAP study and 30 s for the ARIC study for each ionisation mode (first negative, and then positive ion mode) but the overall turnaround time for each sample was of ca. 2 minutes to let the instrument automatically

switch the polarity and the voltage settle before acquiring the data in the next polarity. The data for the negative and positive ionisation mode were acquired in two separate files in the MassLynx™ software. The total time for the analysis of a 96 well-plate was less than 4 hours.

Sodium formate solution was used to calibrate the mass spectrometer on a daily basis. The lock-mass function was turned off but data in both modes were recalibrated post-acquisition by in-house software using reference signals of endogenous metabolites present in all urine samples.

MS/MS was performed for targeted peaks in DIMS in Resolution mode in non-spiked pooled urine sample and pooled urine sample spiked with the standards. The optimal collision energy (CE) was selected for each peak between 10-60 eV. For the endogenous metabolites the spectra were compared to the spectra acquired for the standards in neat solvent and to the metabolite fragmentation patterns available in online databases (HMDB<sup>2</sup> and Metlin<sup>3</sup>).

### **3. Synthetic Test Mixture (TM)**

The TM consisted of glutamine, glutamic acid, creatinine, cytidine, citric acid, leucine, phenylalanine, tryptophan, hippuric acid, benzoic acid, and octanoic acid prepared at 25-100 µM concentration in ultrapure water.

For the analysis, the TM was diluted 10 times with ultrapure water. An aliquot of 50 µL was placed in a well and 100 µL of MeOH containing 0.015% of formic acid (final concentration of formic acid in a well was of 0.01%) were added to maintain 1:2 water-methanol proportion required for a stable nESI signal. The intra-day replicate analysis (n=10) of the TM was done in three separate days (total n=30), and the CV% of signal intensities was assessed intra- and inter-day without and with normalisation (to the sum of the intensities of targeted peaks). The TM was also analysed in two separate days (n=8) to estimate the effect of instrument maintenance (mass spectrometer venting after the nitrogen gas supply shutdown event with subsequent detector setup and chip-alignment procedure in the ChipSoft software) on the signal stability.

## Results and discussion

### 1. Parallel assay – standard addition vs. external calibration curves

In this work, the MS quantification was performed by the back-calculation of the ratio of each selected metabolite to its internal standard and the slope of the calibration curve obtained for that metabolite in the pooled urine sample. In order to show the reliability of our method, we compared the method of standard additions using the pooled urine sample as a matrix with the method of external calibration in the analyte-free matrix. For the INTERMAP study, the solution of boric acid of the same concentration as expected in the urinary specimens was prepared and used as an analyte-free matrix. The accuracy of metabolite quantification by both approaches was tested using the validation QC samples prepared at three different levels of concentrations defined for each metabolite from the corresponding linear range (Table 1). Since the QC samples prepared in analyte-free matrix contained only the known spiked concentration of metabolites, without any background level of metabolites encountered in endogenous matrix, they can be used as a standard to prove the reliability of the method of standard additions. Their quantification was performed by using the slope of the standard addition calibration curve in pooled urine sample and external calibration curve in an analyte-free matrix. The comparison of the slopes of calibration curves obtained by both approaches in the INTERMAP study along with the values of relative error (RE%) of measured concentration for low and medium level QC samples prepared in analyte-free matrix and quantified using standard addition and external calibration curves yielded results corresponding to the adapted acceptance criteria (Table S-2). A similar assessment of matrix effect was undertaken for the ARIC pooled SR samples and analyte-free matrix consisting of water with 0.01% formic acid (Table S-3).

### 2. Analysis of Test Mixture

The TM was analysed over three days to assess intra- (n=10) and inter-day (n=30) variability of signal intensities. Figure S-9(A) demonstrates the inter-day CV% values for the intensities of compounds measured in negative ion mode and the effect of signal normalisation to the sum of intensities of measured compounds. When non-normalised the intensity varied by as much as 25-40% which could be expected in the DIMS experiment taking into account the low concentration of compounds in the TM ( $\mu\text{M}$  diluted 10 times). However, after normalisation to the sum of intensities the CV% value reduced to 15-20 with exception of citric acid (CV% = 26). The TM was used to assess the effect of nitrogen gas shutdown event

and subsequent venting of mass spectrometer followed by detector set-up and chip-alignment procedure for the nESI source. Figure S-9(B) shows the normalised intensity values for the n=8 measurements done before and after the instrument maintenance. The CV% values for all the analytes measured in positive and negative ion mode did not exceed 20 which is an acceptable metabolite precision providing the normalisation was done for targeted analytes.

## Supplementary Tables

**Table S-1. List of metabolites for quantification, their internal standards and the corresponding m/z values**

| Metabolite                     | Adduct       | m/z                   | Internal standrad                                              |
|--------------------------------|--------------|-----------------------|----------------------------------------------------------------|
| Hydroxycinnamic acid           | M-H          | 163.0401              | m-Coumaric acid-1,2,3-13C3                                     |
| Acetylcarnitine                | M+H          | 204.1230              | Acetyl-d3-L-carnitine                                          |
| Arginine                       | M+H          | 175.1195              | L-Arginine-13C6 hydrochloride                                  |
| Ascorbic acid                  | M-H          | 175.0248              | L-Ascorbic acid-1-13C                                          |
| Benzoic Acid                   | M-H          | 121.0295              | Benzoic acid-2,3,4,5,6-d5                                      |
| Caffeic acid                   | M-H          | 179.0350              | Caffeic acid-13C9                                              |
| Carnitine                      | M+H          | 162.1125              | DL-Carnitine-(trimethyl-d9)                                    |
| Cholic acid                    | M-H          | 407.2803              | Cholic acid-2,2,4,4-d4                                         |
| Citric acid                    | M-H          | 191.0197              | Citric acid-2,2,4,4-d4                                         |
| Citrulline                     | M+Na         | 198.0855              | L-Citrulline-4,4,5,5-d4                                        |
| Cotinine                       | M+H          | 177.1022              | (±)-Cotinine-(methyl-d3)                                       |
| Creatine                       | M+H          | 132.0773              | Creatine-d3 (methyl-d3)                                        |
| Creatinine                     | M+H          | 114.0667              | Creatinine-d3 (methyl-d3)                                      |
| Daidzein                       | M-H          | 253.0506              | Daidzein-d4 (4-hydroxyphenyl-2,3,5,6-d4)                       |
| Deoxycholic acid               | M-H          | 391.2854              | Deoxycholic acid-2,2,4,4-d4                                    |
| Genistein                      | M-H          | 269.0455              | Genistein-d4 (4-hydroxyphenyl-2,3,5,6-d4)                      |
| Glutamic acid                  | M-H          | 146.0459              | DL-Glutamic-2,3,3,4,4-d5 acid                                  |
| Glycocholic acid               | M-H          | 464.3018              | Glycocholic-2,2,4,4-d4 acid                                    |
| Glycodeoxycholic acid          | M-H          | 448.3068              | Glycodeoxycholic-2,2,4,4-d4 acid                               |
| Hippuric acid                  | M-H          | 178.0511              | N-Benzoyl-d5-glycine                                           |
| Homovanillic acid              | M-H          | 181.0501              | (4-Hydroxy-3-methoxyphenyl-d3)acetic- $\alpha,\alpha$ -d2 acid |
| Homovanillic acid fragment     | M-H          | 122.0360              |                                                                |
| Hydroxybenzoic acid            | M-H          | 137.0239              | 4-Hydroxybenzoic-2,3,5,6-d4 acid                               |
| Indoxyl sulfate                | M-H          | 212.0023              | Indoxyl-2,4,5,6,7-d5 sulfate                                   |
| Isovalerylglycine              | M-H          | 158.0823              | N-Isovalerylglycine-2,2-d2                                     |
| 2-oxoglutaric acid             | M-H          | 145.0142              | Succinic acid-2,2,3,3-d4                                       |
| Ketoleucine                    | M-H          | 129.0557              | Ketoleucine-1-13C sodium salt                                  |
| Kynurenine                     | M+Na         | 231.0746              | L-Kynurenine sulfate:H2O (ring-d4, 3,3-d2)                     |
| Leucine                        | M-H          | 130.0874              | L-Leucine-1-13C                                                |
| Malic acid                     | M-H          | 133.0137              | (S)-(-)-Malic-2,3,3-d3 acid                                    |
| Methylsuccinic acid            | M-H          | 131.0344              | (±)-2-Methyl-d3-succinic-2,3,3-d3 acid                         |
| N-acetylneuraminic acid        | M-H          | 308.0982              | N-Acetyl-D-[2,3-13C2]neuraminic acid                           |
| Nicotinamide                   | M+H          | 123.0558              | Nicotinamide-2,4,5,6-d4                                        |
| Nicotine                       | M+H          | 163.1230              | DL-Nicotine (methyl-d3, 98%)                                   |
| Nicotinic acid                 | M+H          | 124.0399              | Nicotinic-d4 acid                                              |
| N $\alpha$ -Acetyl-L-ornithine | M+Na         | 197.0902              | N $\alpha$ -Acetyl-L-ornithine-5,5-d2                          |
| Ornithine                      | M+H          | 133.0977              | L-Ornithine-2,3,3,4,4,5,5-d7 HCl                               |
| Phenylacetic acid              | M+H          | 137.0603              | Phenylacetic acid-1,2-13C2                                     |
| Phenylacetylglutamine          | M-H          | 263.1037              | N $\alpha$ -(Phenyl-d5-acetyl)-L-glutamine                     |
| Phenylalanine                  | M-H          | 164.0712              | DL-Phenylalanine-1-13C                                         |
| Proline betaine                | M+H;<br>M+Na | 144.1025;<br>166.0838 | Stachydrine-(dimethyl-13C2)                                    |

|                    |     |          |                                           |
|--------------------|-----|----------|-------------------------------------------|
| Propionylcarnitine | M+H | 218.1392 | Propionyl-L-carnitine-(N-methyl-d3)       |
| Saccharin          | M-H | 181.9917 | Saccharin-d4 (ring-d4)                    |
| Succinic acid      | M-H | 117.0193 | Succinic acid-2,2,3,3-d4                  |
| Taurocholic acid   | M-H | 514.2844 | Taurocholic acid-2,2,4,4-d4 acid          |
| Tryptophan         | M-H | 203.0821 | L-Tryptophan-d5                           |
| Tyramine           | M+H | 138.0892 | 2-(4-Hydroxyphenyl)ethyl-1,1,2,2-d4-amine |
| Tyrosine           | M-H | 180.0661 | L-Tyrosine-3,3-d2                         |

---

**Table S-2. Slope values of calibration curves obtained by the addition of authentic standards into pooled SR sample from the INTERMAP study and in the analyte-free matrix; the values of relative error (RE%) in measured concentration for the QC samples prepared in analyte-free matrix and quantified using both calibration curves.**

| <b>Metabolite<br/>INTERMAP study</b> | <b>Slope in<br/>analyte-free<br/>matrix</b> | <b>Slope of the<br/>standard<br/>addition<br/>curve</b> | <b>RE(%) of QC<sub>low</sub><br/>using analyte-<br/>free matrix<br/>curve</b> | <b>RE(%) of QC<sub>med</sub><br/>using analyte-<br/>free matrix<br/>curve</b> | <b>RE(%) of QC<sub>low</sub><br/>using standard<br/>addition curve</b> | <b>RE(%) of QC<sub>med</sub><br/>using standard<br/>addition curve</b> |
|--------------------------------------|---------------------------------------------|---------------------------------------------------------|-------------------------------------------------------------------------------|-------------------------------------------------------------------------------|------------------------------------------------------------------------|------------------------------------------------------------------------|
| Hydroxycinnamic acid                 | 0.33                                        | 0.36                                                    | 2                                                                             | 4                                                                             | 9                                                                      | 5                                                                      |
| Acetylcarnitine                      | 0.96                                        | 0.97                                                    | 10                                                                            | 2                                                                             | 17                                                                     | 10                                                                     |
| Ascorbic acid                        | 0.41                                        | 0.41                                                    | 6                                                                             | 14                                                                            | >30                                                                    | 9                                                                      |
| Benzoic Acid                         | 0.07                                        | 0.04                                                    | 12                                                                            | 7                                                                             | >30                                                                    | >30                                                                    |
| Caffeic acid                         | 1.33                                        | 1.41                                                    | 4                                                                             | 1                                                                             | 5                                                                      | 6                                                                      |
| Carnitine                            | 0.65                                        | 0.66                                                    | 1                                                                             | 2                                                                             | 22                                                                     | 3                                                                      |
| Cholic acid                          | 0.76                                        | 0.85                                                    | 11                                                                            | 1                                                                             | 10                                                                     | 12                                                                     |
| Citric acid                          | 0.04                                        | 0.04                                                    | 7                                                                             | 5                                                                             | 24                                                                     | 12                                                                     |
| Cotinine                             | 0.70                                        | 0.75                                                    | 1                                                                             | 5                                                                             | 10                                                                     | 3                                                                      |
| Creatine                             | 0.38                                        | 0.41                                                    | >30                                                                           | 5                                                                             | 27                                                                     | 17                                                                     |
| Creatinine                           | 0.86                                        | 0.63                                                    | 20                                                                            | 9                                                                             | 14                                                                     | 18                                                                     |
| Daidzein                             | 1.87                                        | 1.89                                                    | 3                                                                             | 1                                                                             | 23                                                                     | 7                                                                      |
| Deoxycholic acid                     | 0.30                                        | 0.36                                                    | 7                                                                             | 2                                                                             | 3                                                                      | 13                                                                     |
| Genistein                            | 1.49                                        | 1.75                                                    | 9                                                                             | 2                                                                             | 23                                                                     | 20                                                                     |
| Glutamic acid                        | 0.36                                        | 0.33                                                    | 3                                                                             | 1                                                                             | 12                                                                     | 11                                                                     |
| Glycocholic acid                     | 0.65                                        | 0.74                                                    | 9                                                                             | 1                                                                             | 18                                                                     | 15                                                                     |
| Glycodeoxycholic acid                | 0.67                                        | 0.73                                                    | 8                                                                             | 1                                                                             | 16                                                                     | 12                                                                     |
| Hippuric acid                        | 1.10                                        | 1.14                                                    | 6                                                                             | 4                                                                             | 23                                                                     | 14                                                                     |

|                         |      |      |     |    |     |    |
|-------------------------|------|------|-----|----|-----|----|
| Homovanillic acid       | 0.03 | 0.03 | >30 | 1  | >30 | 17 |
| Indoxyl sulfate         | 2.15 | 2.14 | 15  | 8  | 22  | 17 |
| Isovalerylglycine       | 0.79 | 0.78 | 2   | 1  | 2   | 1  |
| 2-oxoglutaric acid      | 0.11 | 0.19 | >30 | 7  | 7   | 16 |
| Ketoleucine             | 0.10 | 0.11 | 0   | 9  | 30  | 8  |
| Kynurenine              | 0.41 | 0.37 | 8   | 6  | 30  | 21 |
| N-acetylneuraminic acid | 0.38 | 0.35 | 8   | 9  | 18  | 19 |
| Nicotine                | 0.31 | 0.34 | 12  | 1  | 18  | 11 |
| Nicotinic acid          | 0.06 | 0.07 | 22  | 5  | 18  | 5  |
| Phenylacetic acid       | 0.16 | 0.17 | 22  | 3  | 24  | 18 |
| Phenylacetylglutamine   | 2.71 | 3.10 | 23  | 5  | >30 | 27 |
| Proline betaine         | 0.99 | 0.75 | 6   | 10 | 1   | 13 |
| Propionylcarnitine      | 1.05 | 1.06 | 11  | 3  | 22  | 12 |
| Saccharin               | 1.38 | 1.65 | 8   | 1  | 28  | 21 |
| Succinic acid           | 0.28 | 0.24 | 10  | 1  | 8   | 19 |
| Taurocholic acid        | 0.52 | 0.62 | 11  | 4  | 27  | 25 |
| Tyramine                | 0.04 | 0.05 | 12  | 1  | 1   | 15 |
| Vanillylmandelic acid   | 0.72 | 0.84 | 11  | 2  | >30 | 11 |

---

**Table S-3. Slope values of calibration curves obtained by the addition of authentic standards in pooled urine sample from the ARIC study and in the analyte-free matrix. The table also compares concentration of metabolites in total pooled SR sample calculated from the standard addition curve compared to the expected concentration levels (from the literature) and LOQ in  $\mu\text{g/mL}$  estimated from the calibration curve obtained in analyte-free matrix.**

| <b>Metabolite<br/>ARIC study</b> | <b>Slope of the<br/>standard<br/>addition<br/>curve</b> | <b>Slope of the<br/>curve in<br/>analyte-free<br/>matrix</b> | <b>Calculated<br/>concentration<br/>in a pooled SR<br/>(<math>\mu\text{mol}/\text{mmol}</math><br/>Creatinine*)</b> | <b>Expected normal<br/>concentration,<br/><math>\mu\text{mol}/\text{mmol}</math><br/>Creatinine</b> | <b>LOQ determined<br/>in analyte-free<br/>matrix (<math>\text{H}_2\text{O}</math>),<br/><math>\text{nmol}/\text{mL}</math></b> |
|----------------------------------|---------------------------------------------------------|--------------------------------------------------------------|---------------------------------------------------------------------------------------------------------------------|-----------------------------------------------------------------------------------------------------|--------------------------------------------------------------------------------------------------------------------------------|
| *Creatinine, mM                  | 0.04                                                    | 0.05                                                         | 5.52                                                                                                                | 10 $\pm$ 2 mM                                                                                       | 37.89                                                                                                                          |
| Benzoic Acid                     | 0.03                                                    | 0.03                                                         | 114.94                                                                                                              | 0.1-150                                                                                             | 1.51                                                                                                                           |
| Citric acid                      | 0.06                                                    | 0.02                                                         | 232.06                                                                                                              | 46.9- 600                                                                                           | 3.15                                                                                                                           |
| Glutamic acid                    | 0.09                                                    | 0.08                                                         | 23.84                                                                                                               | 3.3-18.4                                                                                            | 0.89                                                                                                                           |
| Hippuric acid                    | 0.06                                                    | 0.06                                                         | 371.34                                                                                                              | 19-933                                                                                              | 1.14                                                                                                                           |
| Hydroxybenzoic acid              | 0.14                                                    | 0.14                                                         | 52.70                                                                                                               | 0.7-29                                                                                              | 0.27                                                                                                                           |
| Indoxyl sulfate                  | 0.40                                                    | 0.35                                                         | 9.00                                                                                                                | 6.0–64.8                                                                                            | 0.28                                                                                                                           |
| 2-oxoglutaric acid               | 0.04                                                    | 0.02                                                         | 49.06                                                                                                               | < 150                                                                                               | 0.38                                                                                                                           |
| Ketoleucine                      | 0.08                                                    | 0.06                                                         | 35.56                                                                                                               | 0.02-0.5                                                                                            | 0.24                                                                                                                           |
| Leucine                          | 0.12                                                    | 0.11                                                         | 227.19                                                                                                              | 1.2-19.1                                                                                            | 1.57                                                                                                                           |
| Malic acid                       | 0.77                                                    | 0.61                                                         | 6.04                                                                                                                | 0.7-5.3                                                                                             | n.a.                                                                                                                           |
| Methylsuccinic acid              | 0.07                                                    | 0.07                                                         | 14.17                                                                                                               | 0.4-10.8                                                                                            | 0.31                                                                                                                           |
| N-acetylneuraminic acid          | 0.18                                                    | 0.17                                                         | 12.19                                                                                                               | 2.5-8.6                                                                                             | 0.19                                                                                                                           |
| Nicotinic acid                   | 0.19                                                    | 0.17                                                         | 17.48                                                                                                               | 0.1-0.8                                                                                             | 0.18                                                                                                                           |
| Phenylalanine                    | 0.08                                                    | 0.08                                                         | 13.43                                                                                                               | 1.6-18.2                                                                                            | 0.51                                                                                                                           |
| Succinic acid                    | 0.09                                                    | 0.08                                                         | 35.53                                                                                                               | 0.3-33.3                                                                                            | 1.84                                                                                                                           |
| Tryptophan                       | 0.15                                                    | 0.14                                                         | 8.44                                                                                                                | 1.3-29.4                                                                                            | 0.52                                                                                                                           |
| Tyrosine                         | 0.08                                                    | 0.08                                                         | 27.63                                                                                                               | 3-38.7                                                                                              | 0.83                                                                                                                           |
| Acetylcarnitine                  | 2.34                                                    | 2.92                                                         | 4.74                                                                                                                | 0.4-7.5                                                                                             | 1.08                                                                                                                           |
| Acetyl-L-ornithine               | 0.11                                                    | 0.12                                                         | 19.92                                                                                                               | 0.5-2.8                                                                                             | 1.68                                                                                                                           |
| Arginine                         | 0.87                                                    | 0.89                                                         | 1.95                                                                                                                | 0-23                                                                                                | 0.15                                                                                                                           |
| Carnitine                        | 0.67                                                    | 0.67                                                         | 21.37                                                                                                               | 0.6–15.2                                                                                            | 0.91                                                                                                                           |
| Citrulline                       | 0.15                                                    | 0.16                                                         | 8.71                                                                                                                | 0-74.3                                                                                              | 1.03                                                                                                                           |
| Creatine                         | 0.05                                                    | 0.05                                                         | 37.65                                                                                                               | 10-650                                                                                              | 10.54                                                                                                                          |
| Nicotinamide                     | 0.16                                                    | 0.17                                                         | 21.41                                                                                                               | n.a.                                                                                                | 1.39                                                                                                                           |
| Ornithine                        | 0.11                                                    | 0.10                                                         | 49.01                                                                                                               | 0-22                                                                                                | 7.94                                                                                                                           |
| Phenylacetic acid                | 0.06                                                    | 0.06                                                         | 27.09                                                                                                               | 0.3-1.9                                                                                             | 2.03                                                                                                                           |

**Table S-4. Concentration of metabolites in total pooled SR sample from the INTERMAP study calculated from the standard addition curve compared to the expected concentration levels from the literature<sup>2,4,5</sup> and LOQ in µg/mL estimated from the calibration curve obtained in analyte-free matrix.**

| Metabolite<br>INTERMAP study | Calculated<br>concentration in a<br>pooled SR,<br>µmol/mmol<br>Creatinine* | Expected normal<br>concentration, µmol/mmol<br>Creatinine | LOQ determined in<br>analyte-free matrix,<br>nmol/mL |
|------------------------------|----------------------------------------------------------------------------|-----------------------------------------------------------|------------------------------------------------------|
| <b>*Creatinine mM</b>        | <b>6.46 mM</b>                                                             | <b>10 ±2 mM</b>                                           | 20.34                                                |
| Hydroxycinnamic acid         | 0.30                                                                       | 0.01-0.17                                                 | 1.22                                                 |
| Ascorbic acid                | 55.65                                                                      | 3.8-85.5                                                  | 1.14                                                 |
| Benzoic Acid                 | 113.27                                                                     | 0.1-150                                                   | 26.22                                                |
| Caffeic acid                 | 1.29                                                                       | 0.01-0.38                                                 | 0.56                                                 |
| Cholic acid                  | 0.94                                                                       | 0.43-0.73                                                 | 0.24                                                 |
| Citric acid                  | 209.32                                                                     | 46.9- 600                                                 | 10.94                                                |
| Daidzein                     | 0.75                                                                       | 0.002–0.064;<br>2.43 after soya consumption               | 0.39                                                 |
| Deoxycholic acid             | 0.49                                                                       | 0.05-0.06                                                 | 0.25                                                 |
| Genistein                    | 1.29                                                                       | 0.03-0.11;<br>0.39 after soya consumption                 | 0.37                                                 |
| Glutamic acid                | 9.57                                                                       | 3.3-18.4                                                  | 4.08                                                 |
| Glycocholic acid             | 0.19                                                                       | 0.03±0.057                                                | 0.21                                                 |
| Glycodeoxycholic acid        | 0.61                                                                       | n.a.                                                      | 0.22                                                 |
| Hippuric acid                | 107.34                                                                     | 19-933                                                    | 10.61                                                |
| Homovanillic acid            | 9.98                                                                       | 0.1-10                                                    | 6.59                                                 |
| Indoxyl sulfate              | 8.43                                                                       | 6.0–64.8                                                  | 5.63                                                 |
| Isovalerylglycine            | 2.79                                                                       | 1.0–10.0                                                  | 0.63                                                 |
| 2-oxoglutaric acid           | 7.37                                                                       | 0.18-17                                                   | 2.05                                                 |
| Ketoleucine                  | 38.87                                                                      | 0.02-0.45                                                 | 0.77                                                 |
| Leucine                      | 49.32                                                                      | 1.2-19.1                                                  | n.a                                                  |
| N-acetylneuraminic acid      | 12.28                                                                      | 2.5-8.6                                                   | 0.65                                                 |
| Phenylacetylglutamine        | 29.53                                                                      | 0.5-78                                                    | 3.03                                                 |
| Saccharin                    | 2.16                                                                       | n.a.                                                      | 0.55                                                 |
| Succinic acid                | 84.77                                                                      | 0.3-33.3                                                  | 5.08                                                 |
| Taurocholic acid             | 0.75                                                                       | n.a.                                                      | 0.19                                                 |
| Vanillylmandelic acid        | 4.56                                                                       | 0.6-3                                                     | 2.52                                                 |
| Acetylcarnitine              | 1.82                                                                       | 0.4-7.5                                                   | 0.98                                                 |
| Carnitine                    | 11.13                                                                      | 0.6–15.2                                                  | 1.24                                                 |
| Cotinine                     | 0.43                                                                       | ca. 0.37-3.0 (active smoker)                              | 0.57                                                 |
| Creatine                     | 127.50                                                                     | 10-650                                                    | 17.55                                                |
| Hexoses                      | 587.42                                                                     | 37–501                                                    | n.a.                                                 |
| Kynurenine                   | 4.81                                                                       | 1.1–2.5                                                   | 1.92                                                 |
| Nicotine                     | 0.44                                                                       | ca. 7-9 (active smoker)                                   | 0.62                                                 |

|                    |       |           |      |
|--------------------|-------|-----------|------|
| Nicotinic acid     | 6.10  | 0.1-0.82  | 0.29 |
| Phenylacetic acid  | 0.39  | 0.3-1.9   | 2.21 |
| Proline betaine    | 48.75 | 0.8-23.7  | 4.19 |
| Propionylcarnitine | 1.48  | 0.01-0.20 | 0.92 |
| Tyramine           | 14.29 | 0.23-0.78 | 3.65 |

---

**Table S-5. Concentration of metabolites in mM calculated by standard addition method for eight pooled SR samples (24 hrs collection) obtained for four populations (USA, UK, PRC, and Japan) and two visits (first – F and repeat – R) from the INTERMAP study and pooled spot urine SR sample from the ARIC study.**

| <b>Metabolite/Concentration in pooled urine sample, mM</b> | <b>USA-F</b> | <b>USA-R</b> | <b>UK-F</b> | <b>UK-R</b> | <b>PRC-F</b> | <b>PRC-R</b> | <b>J-F</b> | <b>J-R</b> | <b>ARIC</b> |
|------------------------------------------------------------|--------------|--------------|-------------|-------------|--------------|--------------|------------|------------|-------------|
| Creatinine                                                 | 6.27         | 6.52         | 8.46        | 6.79        | 4.81         | 7.82         | 7.56       | 6.59       | 8.71        |
| Hydroxycinnamic acid                                       | 0.02         | 0.02         | 0.03        | 0.02        | 0.04         | 0.03         | 0.03       | 0.03       |             |
| Ascorbic acid                                              | 0.51         | 0.43         | 0.49        | 0.34        | 0.13         | 0.24         | 0.22       | 0.25       |             |
| Benzoic Acid                                               | 0.79         | 1.01         | 0.81        | 0.79        | 0.80         | 1.35         | 1.05       | 0.70       | 1.52        |
| Citric acid                                                | 1.90         | 1.76         | 2.65        | 2.27        | 1.13         | 1.96         | 1.90       | 1.59       | 1.14        |
| Daidzein                                                   | <i>n.d.</i>  | <i>n.d.</i>  | <i>n.d.</i> | <i>n.d.</i> | <i>n.d.</i>  | <i>n.d.</i>  | 0.001      | 0.001      |             |
| Glutamic acid                                              | 0.14         | 0.15         | 0.16        | 0.14        | 0.13         | 0.20         | 0.19       | 0.19       | 0.19        |
| Hippuric acid                                              | 0.73         | 1.08         | 1.54        | 1.34        | 0.47         | 1.10         | 0.66       | 0.51       | 4.41        |
| Indoxyl sulfate                                            | 0.11         | 0.13         | 0.11        | 0.05        | 0.06         | 0.06         | 0.21       | 0.03       | 0.05        |
| Isovalerylglycine                                          | 0.02         | 0.02         | 0.03        | 0.02        | 0.03         | 0.04         | 0.03       | 0.04       |             |
| 2-oxoglutaric acid                                         | 0.30         | 0.25         | 0.42        | 0.40        | 0.32         | 0.42         | 0.39       | 0.31       | 0.57        |
| Ketoleucine                                                | 0.18         | 0.19         | 0.22        | 0.21        | 0.19         | 0.26         | 0.26       | 0.19       | 0.06        |
| Leucine                                                    | 0.45         | 0.42         | 0.43        | 0.40        | 0.47         | 0.60         | 0.58       | 0.51       | 0.17        |
| N-acetyl neuraminic acid                                   | 0.09         | 0.09         | 0.11        | 0.09        | 0.07         | 0.11         | 0.09       | 0.07       | 0.10        |
| Phenylacetylglutamine                                      | 0.36         | 0.35         | 0.53        | 0.42        | 0.20         | 0.43         | 0.39       | 0.27       |             |
| Saccharin                                                  | 0.04         | 0.04         | 0.05        | 0.05        | 0.01         | 0.02         | 0.02       | 0.02       |             |
| Succinic acid                                              | 0.41         | 0.38         | 0.53        | 0.36        | 0.42         | 0.42         | 0.37       | 0.34       | 0.28        |
| Vanillylmandelic acid                                      | 0.03         | 0.03         | 0.06        | 0.03        | 0.03         | 0.02         | 0.02       | 0.03       |             |
| Acetylcarnitine                                            | 0.02         | 0.03         | 0.04        | 0.02        | 0.02         | 0.02         | 0.03       | 0.03       | 0.04        |
| Carnitine                                                  | 0.13         | 0.10         | 0.13        | 0.11        | 0.09         | 0.10         | 0.13       | 0.10       | 0.15        |
| Cotinine                                                   | 0.003        | 0.004        | 0.004       | 0.003       | 0.006        | 0.007        | 0.006      | 0.005      |             |
| Creatine                                                   | 0.96         | 1.02         | 1.05        | 1.07        | 0.85         | 0.93         | 1.67       | 1.32       | 0.38        |
| Nicotine                                                   | 0.007        | 0.005        | 0.008       | 0.003       | 0.007        | 0.008        | 0.008      | 0.007      |             |
| Nicotinic acid                                             | 0.05         | 0.06         | 0.11        | 0.06        | 0.07         | 0.09         | 0.10       | 0.07       | 0.21        |
| Proline betaine                                            | 0.29         | 0.33         | 0.26        | 0.19        | 0.21         | 0.23         | 0.23       | 0.19       |             |
| Tyramine                                                   | 0.21         | 0.24         | 0.22        | 0.19        | 0.16         | 0.22         | 0.23       | 0.22       |             |

*n.d.* – < LLOQ

**Table S-6. Intra- and inter-day accuracy and precision values for several metabolites measured in positive and negative ion modes in validation QC samples from the USA-F and Japan-F populations from the INTERMAP study.**

| Metabolite<br>INTERMAP study<br>USA-F and Japan-F<br>populations |       | Accuracy                 |                          |                         |                         |                         |                         | Precision, CV%           |                          |                         |                         |                         |                         |
|------------------------------------------------------------------|-------|--------------------------|--------------------------|-------------------------|-------------------------|-------------------------|-------------------------|--------------------------|--------------------------|-------------------------|-------------------------|-------------------------|-------------------------|
|                                                                  |       | QC high<br>intra-<br>day | QC high<br>inter-<br>day | QC med<br>intra-<br>day | QC med<br>inter-<br>day | QC low<br>intra-<br>day | QC low<br>inter-<br>day | QC high<br>intra-<br>day | QC high<br>inter-<br>day | QC med<br>intra-<br>day | QC med<br>inter-<br>day | QC low<br>intra-<br>day | QC low<br>inter-<br>day |
| Hydroxycinnamic acid                                             | USA   | 90                       | 94                       | 119                     | 118                     | 103                     | 105                     | 4                        | 10                       | 6                       | 6                       | 6                       | 9                       |
|                                                                  | Japan | 99                       | 98                       | 94                      | 94                      | 98                      | 96                      | 1                        | 3                        | 5                       | 5                       | 10                      | 9                       |
| Acetylcarnitine                                                  | USA   | 94                       | 98                       | 118                     | 118                     | 94                      | 105                     | 4                        | 11                       | 4                       | 7                       | 5                       | 17                      |
|                                                                  | Japan | 115                      | 113                      | 99                      | 97                      | 109                     | 106                     | 8                        | 9                        | 13                      | 12                      | 15                      | 15                      |
| Ascorbic acid                                                    | USA   | 80                       | 76                       | 91                      | 101                     | 81                      | 71                      | 9                        | 22                       | 10                      | 11                      | >30                     | >30                     |
|                                                                  | Japan | 81                       | 85                       | 118                     | 115                     | 124                     | 105                     | 5                        | 17                       | 9                       | 26                      | 17                      | 25                      |
| Benzoic Acid                                                     | USA   | 102                      | 99                       | 117                     | 114                     | 125                     | 121                     | 13                       | 13                       | 13                      | 19                      | 13                      | 19                      |
|                                                                  | Japan | 109                      | 108                      | 110                     | 104                     | 120                     | 107                     | 2                        | 6                        | 8                       | 11                      | 14                      | 27                      |
| Caffeic acid                                                     | USA   | 107                      | 105                      | 111                     | 112                     | 128                     | 125                     | 2                        | 24                       | 1                       | 28                      | 1                       | 29                      |
|                                                                  | Japan | 114                      | 110                      | 97                      | 95                      | 115                     | 109                     | 2                        | 23                       | 6                       | 22                      | 8                       | 25                      |
| Carnitine                                                        | USA   | 115                      | 110                      | 104                     | 107                     | 125                     | 117                     | 9                        | 10                       | 10                      | 9                       | 15                      | 17                      |
|                                                                  | Japan | 104                      | 103                      | 84                      | 85                      | 83                      | 81                      | 7                        | 6                        | 10                      | 11                      | 15                      | 15                      |
| Cholic acid                                                      | USA   | 104                      | 106                      | 89                      | 95                      | 97                      | 96                      | 4                        | 2                        | 1                       | 13                      | 2                       | 3                       |
|                                                                  | Japan | 104                      | 99                       | 94                      | 94                      | 92                      | 90                      | 4                        | 5                        | 3                       | 3                       | 12                      | 11                      |
| Citric acid                                                      | USA   | 101                      | 107                      | 130                     | 124                     | 122                     | 120                     | 1                        | 14                       | 6                       | 27                      | 28                      | 26                      |
|                                                                  | Japan | 119                      | 115                      | 70                      | 70                      | 70                      | 70                      | 4                        | 6                        | 29                      | 27                      | 27                      | 23                      |
| Cotinine                                                         | USA   | 101                      | 102                      | 108                     | 109                     | 105                     | 105                     | 1                        | 3                        | 1                       | 10                      | 2                       | 9                       |
|                                                                  | Japan | 108                      | 107                      | 96                      | 95                      | 99                      | 96                      | 1                        | 5                        | 6                       | 6                       | 12                      | 13                      |
| Creatine                                                         | USA   | 111                      | 110                      | 108                     | 105                     | 88                      | 92                      | 3                        | 4                        | 4                       | 16                      | 9                       | 29                      |
|                                                                  | Japan | 104                      | 104                      | 86                      | 87                      | 94                      | 85                      | 7                        | 6                        | 12                      | 11                      | >30                     | >30                     |
| Creatinine                                                       | USA   | 98                       | 99                       | 104                     | 104                     | 80                      | 89                      | 3                        | 5                        | 3                       | 17                      | 12                      | 25                      |

|                         |       |     |     |     |     |      |     |    |    |     |     |     |     |
|-------------------------|-------|-----|-----|-----|-----|------|-----|----|----|-----|-----|-----|-----|
|                         | Japan | 106 | 106 | 106 | 104 | 130  | 130 | 5  | 4  | 7   | 7   | 7   | >30 |
| Daidzein                | USA   | 103 | 103 | 112 | 114 | 122  | 124 | 3  | 8  | 2   | 7   | 2   | 15  |
|                         | Japan | 103 | 101 | 91  | 90  | 106  | 102 | 2  | 4  | 7   | 7   | 10  | 11  |
| Deoxycholic acid        | USA   | 108 | 107 | 89  | 90  | 95   | 101 | 7  | 3  | 2   | 10  | 1   | 2   |
|                         | Japan | 110 | 108 | 99  | 99  | 101  | 97  | 5  | 6  | 10  | 9   | 23  | 22  |
| Genistein               | USA   | 105 | 103 | 111 | 113 | 128  | 130 | 2  | 9  | 2   | 8   | 1   | 12  |
|                         | Japan | 110 | 108 | 94  | 93  | 107  | 107 | 2  | 5  | 4   | 5   | 6   | 8   |
| Glutamic acid           | USA   | 104 | 103 | 106 | 112 | 112  | 114 | 3  | 8  | 3   | 8   | 5   | 11  |
|                         | Japan | 98  | 97  | 89  | 91  | 90   | 89  | 3  | 5  | 4   | 5   | 6   | 6   |
| Glycocholic acid        | USA   | 95  | 97  | 79  | 88  | 87   | 89  | 7  | 2  | 4   | 20  | 3   | 4   |
|                         | Japan | 110 | 108 | 97  | 97  | 107  | 107 | 1  | 4  | 4   | 5   | 5   | 9   |
| Glycodeoxycholic acid   | USA   | 99  | 98  | 90  | 97  | 117  | 111 | 3  | 5  | 1   | 14  | 2   | 8   |
|                         | Japan | 111 | 108 | 102 | 104 | 112  | 106 | 1  | 5  | 14  | 16  | 18  | 19  |
| Hippuric acid           | USA   | 105 | 105 | 109 | 111 | 93   | 111 | 3  | 9  | 3   | 11  | 3   | 25  |
|                         | Japan | 119 | 116 | 89  | 90  | 98   | 97  | 8  | 8  | 9   | 9   | 17  | 19  |
| Homovanillic acid       | USA   | 106 | 107 | 97  | 99  | 87   | 93  | 11 | 4  | 17  | 15  | 4   | 6   |
|                         | Japan | 80  | 81  | 87  | 55  | 89   | 87  | 6  | 11 | 11  | 15  | 15  | 16  |
| Indoxyl sulfate         | USA   | 105 | 104 | 117 | 115 | 109  | 105 | 8  | 11 | 5   | 7   | 2   | 11  |
|                         | Japan | 106 | 102 | 103 | 101 | 112  | 104 | 9  | 11 | 11  | 11  | 11  | 18  |
| Isovalerylglycine       | USA   | 106 | 104 | 104 | 111 | 122  | 122 | 7  | 10 | 6   | 12  | 2   | 17  |
|                         | Japan | 99  | 101 | 81  | 86  | 80   | 86  | 6  | 7  | 6   | 10  | 11  | 16  |
| 2-oxoglutaric acid      | USA   | 91  | 99  | 75  | 82  | >130 | 115 | 5  | 11 | 19  | 22  | >30 | >30 |
|                         | Japan | 88  | 91  | <70 | <70 | 84   | 81  | 9  | 16 | >30 | >30 | >30 | >30 |
| Ketoleucine             | USA   | 91  | 94  | 83  | 92  | 72   | 74  | 4  | 6  | 7   | 18  | 28  | 5   |
|                         | Japan | 90  | 88  | 97  | 94  | 101  | 95  | 4  | 10 | 11  | 12  | 21  | >30 |
| Kynurenine              | USA   | 102 | 102 | 116 | 117 | 78   | 72  | 4  | 4  | 4   | 6   | 4   | 10  |
|                         | Japan | 98  | 98  | 103 | 101 | 97   | 93  | 7  | 7  | 9   | 8   | 18  | 18  |
| Leucine                 | USA   | 103 | 105 | 83  | 87  | 99   | 92  | 3  | 4  | 5   | 11  | 7   | 9   |
|                         | Japan | 106 | 102 | 96  | 92  | <70  | <70 | 4  | 8  | 12  | 15  | >30 | >30 |
| N-acetylneuraminic acid | USA   | 108 | 104 | 107 | 109 | 87   | 84  | 4  | 10 | 4   | 18  | 11  | 15  |

|                       |       |     |     |     |     |      |      |   |    |    |    |    |    |
|-----------------------|-------|-----|-----|-----|-----|------|------|---|----|----|----|----|----|
|                       | Japan | 113 | 112 | 112 | 108 | >130 | 123  | 4 | 10 | 4  | 7  | 6  | 15 |
| Nicotine              | USA   | 102 | 103 | 114 | 113 | 101  | 110  | 2 | 4  | 2  | 8  | 2  | 18 |
|                       | Japan | 110 | 106 | 96  | 95  | 93   | 89   | 1 | 7  | 5  | 6  | 10 | 13 |
| Nicotinic acid        | USA   | 107 | 106 | 108 | 110 | 106  | 97   | 7 | 6  | 9  | 16 | 13 | 19 |
|                       | Japan | 90  | 91  | 88  | 88  | 97   | 89   | 8 | 7  | 2  | 9  | 27 | 25 |
| Phenylacetic acid     | USA   | 110 | 110 | 103 | 103 | 130  | 127  | 4 | 6  | 3  | 4  | 2  | 17 |
|                       | Japan | 105 | 105 | 87  | 87  | 101  | 99   | 4 | 5  | 6  | 7  | 9  | 8  |
| Phenylacetylglutamine | USA   | 107 | 105 | 109 | 108 | 105  | 108  | 3 | 10 | 4  | 13 | 3  | 15 |
|                       | Japan | 126 | 122 | 97  | 97  | 130  | 126  | 3 | 7  | 9  | 8  | 18 | 23 |
| Proline betaine       | USA   | 104 | 104 | 104 | 106 | 114  | 106  | 5 | 5  | 5  | 16 | 3  | 29 |
|                       | Japan | 104 | 101 | 96  | 98  | 117  | 111  | 4 | 8  | 7  | 9  | 5  | 13 |
| Propionylcarnitine    | USA   | 99  | 102 | 117 | 115 | 103  | 108  | 2 | 17 | 4  | 20 | 4  | 19 |
|                       | Japan | 95  | 94  | 95  | 96  | 101  | 106  | 6 | 10 | 7  | 10 | 12 | 16 |
| Saccharin             | USA   | 119 | 111 | 122 | 115 | 123  | 128  | 3 | 14 | 2  | 27 | 9  | 24 |
|                       | Japan | 126 | 119 | 113 | 107 | >130 | >130 | 8 | 14 | 11 | 16 | 6  | 26 |
| Succinic acid         | USA   | 96  | 96  | 108 | 109 | 101  | 96   | 5 | 12 | 5  | 13 | 8  | 15 |
|                       | Japan | 103 | 103 | 96  | 97  | 102  | 98   | 3 | 6  | 8  | 7  | 10 | 12 |
| Taurocholic acid      | USA   | 102 | 103 | 75  | 87  | <70  | <70  | 2 | 3  | 4  | 25 | 9  | 9  |
|                       | Japan | 104 | 102 | 96  | 96  | 84   | 105  | 3 | 4  | 5  | 6  | 27 | 25 |
| Tyramine              | USA   | 102 | 105 | 106 | 108 | 109  | 110  | 4 | 15 | 5  | 9  | 11 | 21 |
|                       | Japan | 123 | 117 | 107 | 103 | 122  | 115  | 4 | 5  | 8  | 9  | 22 | 28 |
| Vanillylmandelic acid | USA   | 108 | 109 | 109 | 111 | 110  | 119  | 6 | 12 | 7  | 8  | 4  | 20 |
|                       | Japan | 102 | 101 | 87  | 89  | 97   | 96   | 6 | 8  | 4  | 4  | 5  | 7  |

**Table S-7. In-study validation as inter-day relative error (RE%) of measured concentration and precision values for metabolites measured in positive and negative ion modes in validation QC samples from the ARIC study.**

| Metabolite<br>ARIC study | Accuracy, RE%<br>QC in pooled urine sample |                     |                     | Precision, CV%<br>QC in pooled urine sample |                     |                     |
|--------------------------|--------------------------------------------|---------------------|---------------------|---------------------------------------------|---------------------|---------------------|
|                          | QC high<br>inter-day                       | QC med<br>inter-day | QC low<br>inter-day | QC high<br>inter-day                        | QC med<br>inter-day | QC low<br>inter-day |
| Acetyl-L-ornithine       | 10                                         | 15                  | 18                  | 11                                          | 16                  | 20                  |
| Arginine                 | 8                                          | 13                  | 17                  | 8                                           | 13                  | 20                  |
| Benzoic Acid             | 9                                          | 8                   | 30                  | 11                                          | 22                  | >30                 |
| Carnitine                | 29                                         | 14                  | 27                  | 5                                           | 10                  | 23                  |
| Citrulline               | 8                                          | 14                  | 25                  | 10                                          | 15                  | 24                  |
| Creatine                 | 6                                          | 12                  | 13                  | 5                                           | 15                  | 15                  |
| Creatinine               | 11                                         | 16                  | >30                 | 9                                           | 21                  | 24                  |
| Glutamic acid            | 8                                          | 9                   | 10                  | 7                                           | 14                  | 13                  |
| Hydroxybenzoic acid      | 4                                          | 7                   | 8                   | 5                                           | 7                   | 10                  |
| Indoxyl sulfate          | 16                                         | 10                  | 9                   | 5                                           | 12                  | 12                  |
| 2-oxoglutaric acid       | 9                                          | 12                  | 19                  | 12                                          | 17                  | 18                  |
| Leucine                  | 7                                          | 14                  | 11                  | 8                                           | 12                  | 9                   |
| Malic acid               | 10                                         | 11                  | 17                  | 13                                          | 14                  | 25                  |
| Methylsuccinic acid      | 7                                          | 19                  | 20                  | 9                                           | 17                  | 24                  |
| N-acetyl neuraminic acid | 8                                          | 11                  | 14                  | 7                                           | 11                  | 16                  |
| Nicotinamide             | 10                                         | 20                  | 24                  | 10                                          | 24                  | >30                 |
| Nicotinic acid           | 10                                         | 18                  | 21                  | 11                                          | 18                  | 16                  |
| Ornithine                | 9                                          | 24                  | 32                  | 10                                          | 21                  | 31                  |
| Phenylacetic acid        | 8                                          | 16                  | 25                  | 8                                           | 19                  | >30                 |
| Phenylalanine            | 6                                          | 11                  | 24                  | 7                                           | 13                  | 27                  |
| Succinic acid            | 10                                         | 12                  | 18                  | 12                                          | 18                  | 23                  |
| Tryptophan               | 11                                         | 15                  | 19                  | 11                                          | 18                  | 25                  |
| Tyrosine                 | 9                                          | 9                   | 10                  | 7                                           | 9                   | 10                  |

**Table S-8. Inter-batch precision values (CV%) obtained for validation QC samples and dilution SR series from the USA-F (14 batches) and Japan-F (10 batches) populations from the INTERMAP study and quantified using the calibration curves from each batch.**

| Sample type<br>INTERMAP study | Dilution QC 1:100<br>(n=11) |                 | Dilution QC 1:50<br>(n=11) |                 | Dilution QC 1:30<br>(n=11) |                 | Dilution QC 1:20<br>(n=11) |                 | Validation QC<br>low (n=22) |                 | Validation QC<br>medium (n=22) |                 | Validation QC<br>high (n=22) |                 |
|-------------------------------|-----------------------------|-----------------|----------------------------|-----------------|----------------------------|-----------------|----------------------------|-----------------|-----------------------------|-----------------|--------------------------------|-----------------|------------------------------|-----------------|
|                               | USA<br>(n=14)               | Japan<br>(n=10) | USA<br>(n=14)              | Japan<br>(n=10) | USA<br>(n=14)              | Japan<br>(n=10) | USA<br>(n=14)              | Japan<br>(n=10) | USA<br>(n=14)               | Japan<br>(n=10) | USA<br>(n=14)                  | Japan<br>(n=10) | USA<br>(n=14)                | Japan<br>(n=10) |
| Hydroxycinnamic acid          | 27%                         | 22%             | 22%                        | 17%             | 18%                        | 12%             | 16%                        | 14%             | 13%                         | 11%             | 11%                            | 10%             | 11%                          | 12%             |
| Ascorbic acid                 | 18%                         | 29%             | 21%                        | 27%             | 21%                        | 18%             | >30%                       | 23%             | 24%                         | 18%             | 11%                            | 11%             | 7%                           | 13%             |
| Benzoic Acid                  | 18%                         | 18%             | 20%                        | 14%             | 16%                        | 13%             | 10%                        | 16%             | 16%                         | 15%             | 13%                            | 14%             | 15%                          | 17%             |
| Caffeic acid                  | 19%                         | 21%             | 13%                        | 20%             | 17%                        | 14%             | 12%                        | 18%             | 7%                          | 12%             | 9%                             | 9%              | 6%                           | 14%             |
| Citric acid                   | 21%                         | 19%             | 27%                        | 22%             | 16%                        | 13%             | 22%                        | 15%             | 26%                         | 20%             | 22%                            | 19%             | 11%                          | 14%             |
| Daidzein                      | 18%                         | 17%             | 15%                        | 24%             | 21%                        | 25%             | 21%                        | 11%             | 11%                         | 13%             | 12%                            | 11%             | 10%                          | 15%             |
| Genistein                     | 19%                         | n.d.            | 21%                        | n.d.            | 21%                        | n.d.            | 18%                        | n.d.            | 13%                         | n.d.            | 13%                            | n.d.            | 9%                           | n.d.            |
| Glutamic acid                 | 22%                         | >30%            | 19%                        | 15%             | 18%                        | 12%             | 14%                        | 6%              | 10%                         | 8%              | 8%                             | 7%              | 7%                           | 11%             |
| Hippuric acid                 | 21%                         | 20%             | 21%                        | 28%             | 21%                        | 15%             | 20%                        | 10%             | 17%                         | 21%             | 15%                            | 18%             | 13%                          | 17%             |
| Homovanillic acid             | 18%                         | 27%             | 25%                        | 17%             | 18%                        | 12%             | 13%                        | 14%             | 24%                         | 18%             | 18%                            | 14%             | 13%                          | 13%             |
| Indoxyl sulfate               | 26%                         | >30%            | 20%                        | 18%             | 23%                        | 30%             | 21%                        | 21%             | 14%                         | 23%             | 13%                            | 16%             | 12%                          | 19%             |
| Isovalerylglycine             | 14%                         | 10%             | 14%                        | 16%             | 12%                        | 8%              | 8%                         | 10%             | 9%                          | 10%             | 8%                             | 9%              | 8%                           | 13%             |
| 2-oxoglutaric acid            | 28%                         | >30%            | 27%                        | >30%            | 25%                        | 30%             | 29%                        | 27%             | >30%                        | 30%             | >30%                           | 22%             | 22%                          | 22%             |
| Ketoleucine                   | 23%                         | >30%            | 25%                        | 26%             | 14%                        | 22%             | 11%                        | 23%             | 24%                         | 27%             | 28%                            | 23%             | 12%                          | 16%             |
| Leucine                       | 26%                         | 24%             | 25%                        | 18%             | 22%                        | 12%             | 15%                        | 13%             | 19%                         | 16%             | 14%                            | 11%             | 10%                          | 11%             |
| N-acetylneuraminic acid       | 19%                         | 11%             | 21%                        | 14%             | 20%                        | 10%             | 15%                        | 11%             | 15%                         | 12%             | 11%                            | 9%              | 9%                           | 13%             |
| Phenylacetylglutamine         | 21%                         | 20%             | 18%                        | >30%            | 21%                        | 18%             | 21%                        | 11%             | 22%                         | 20%             | 16%                            | 13%             | 13%                          | 21%             |
| Saccharin                     | 19%                         | 15%             | 18%                        | 19%             | 23%                        | 10%             | 21%                        | 12%             | 17%                         | 15%             | 14%                            | 11%             | 10%                          | 15%             |
| Succinic acid                 | 20%                         | 25%             | 25%                        | 25%             | 14%                        | 16%             | 8%                         | 16%             | 14%                         | 17%             | 11%                            | 14%             | 10%                          | 17%             |
| Vanillylmandelic acid         | 16%                         | 11%             | 17%                        | 11%             | 14%                        | 10%             | 13%                        | 11%             | 10%                         | 9%              | 9%                             | 11%             | 9%                           | 15%             |
| Acetylcarnitine               | 17%                         | 20%             | 17%                        | 25%             | 17%                        | 17%             | 12%                        | 15%             | 18%                         | 20%             | 24%                            | 16%             | 10%                          | 18%             |
| Carnitine                     | 8%                          | 18%             | 15%                        | 23%             | 13%                        | 17%             | 11%                        | 14%             | 13%                         | 20%             | 23%                            | 13%             | 9%                           | 15%             |

|                    |      |      |      |      |      |      |      |      |      |     |      |     |      |     |
|--------------------|------|------|------|------|------|------|------|------|------|-----|------|-----|------|-----|
| Cotinine           | 23%  | 16%  | 19%  | 21%  | 21%  | 15%  | 17%  | 10%  | 7%   | 14% | 19%  | 10% | 5%   | 14% |
| Creatine           | 22%  | 26%  | 23%  | 29%  | 23%  | 20%  | 19%  | 15%  | 21%  | 20% | 25%  | 11% | 11%  | 13% |
| Creatinine         | 19%  | 21%  | 19%  | 29%  | 19%  | 21%  | 19%  | 18%  | 18%  | 24% | 27%  | 17% | 14%  | 21% |
| Kynurenine         | n.d. | 21%  | n.d. | 17%  | n.d. | 19%  | n.d. | 18%  | n.d. | 11% | n.d. | 9%  | n.d. | 12% |
| Nicotine           | 16%  | 21%  | 21%  | 22%  | 24%  | 22%  | 25%  | 18%  | 12%  | 17% | 21%  | 13% | 5%   | 15% |
| Nicotinic acid     | n.d. | 17%  | 16% | 24%  | 10% | 11%  | 17% |
| Phenylacetic acid  | 26%  | 79%  | 23%  | >30% | 27%  | 20%  | 42%  | 20%  | 14%  | 13% | 22%  | 12% | 6%   | 15% |
| Proline betaine    | 19%  | 26%  | 20%  | >30% | 19%  | 23%  | 15%  | 19%  | 14%  | 23% | 25%  | 16% | 11%  | 23% |
| Propionylcarnitine | 19%  | 22%  | 20%  | 21%  | 19%  | 16%  | 15%  | 15%  | 14%  | 22% | 21%  | 18% | 11%  | 17% |
| Tyramine           | n.d. | n.d. | n.d. | n.d. | >30% | >30% | 24%  | 24%  | 24%  | 18% | 26%  | 12% | 13%  | 17% |

**Table S-9. Inter-batch precision values (CV%) obtained for pooled SR and dilution SR series from the ARIC study and quantified using the calibration curves from each batch (n).**

| <b>ARIC study metabolite</b> | <b>Pooled SR<br/>n=30</b> | <b>Dilution SR 1/10<br/>n=12</b> | <b>Dilution SR 1/50<br/>n=12</b> |
|------------------------------|---------------------------|----------------------------------|----------------------------------|
| Benzoic Acid                 | 13%                       | 8%                               | 20%                              |
| Citric acid                  | 20%                       | 11%                              | 10%                              |
| Glutamic acid                | 10%                       | 10%                              | 17%                              |
| Hippuric acid                | 11%                       | 10%                              | 20%                              |
| Hydroxybenzoic acid          | 7%                        | 6%                               | 13%                              |
| Indoxyl sulfate              | 8%                        | 7%                               | 13%                              |
| 2-oxoglutaric acid           | 12%                       | 9%                               | 19%                              |
| Ketoleucine                  | 13%                       | 14%                              | 25%                              |
| Leucine                      | 14%                       | 11%                              | 22%                              |
| Malic acid                   | 11%                       | 10%                              | 16%                              |
| Methylsuccinic acid          | 13%                       | 10%                              | 19%                              |
| N-acetylneuraminic acid      | 7%                        | 10%                              | 12%                              |
| Nicotinic acid               | 14%                       | 11%                              | 12%                              |
| Phenylalanine                | 10%                       | 9%                               | 15%                              |
| Succinic acid                | 12%                       | 10%                              | >30%                             |
| Tryptophan                   | 8%                        | 8%                               | 11%                              |
| Tyrosine                     | 17%                       | 12%                              | 18%                              |
| Acetylcarnitine              | 28%                       | 24%                              | 26%                              |
| Arginine                     | 7%                        | 10%                              | 26%                              |
| Carnitine                    | 12%                       | 7%                               | 15%                              |
| Citrulline                   | 17%                       | 20%                              | 24%                              |
| Creatine                     | 9%                        | 15%                              | 12%                              |
| Creatinine                   | 9%                        | 12%                              | 14%                              |
| Nicotinamide                 | 21%                       | 30%                              | 30%                              |
| Ornithine                    | 15%                       | 10%                              | 18%                              |
| Phenylacetic acid            | 10%                       | 12%                              | 14%                              |

Supplementary Figures

Figure S-1. Flowchart representing DI-nESI-HRMS method optimization and validation process

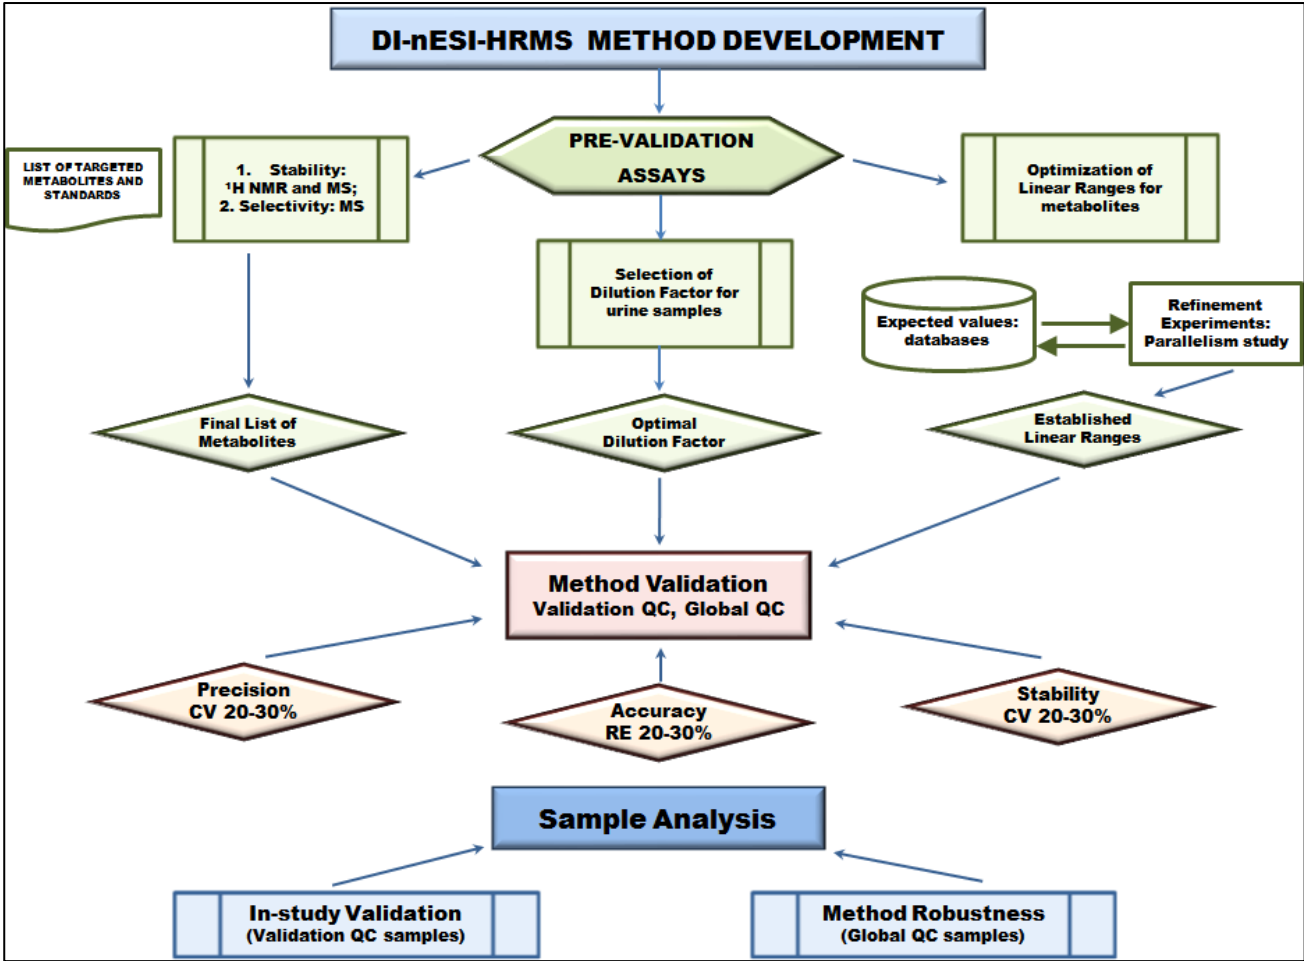

Figure S-2.  $^1\text{H}$  NMR spectra of labelled glutamic acid- $\text{d}_5$  standard (A) and labelled proline betaine- $^{13}\text{C}_2$  standard (B). The lower panel in each spectrum shows the first measurement, and the upper panel – the second measurement two months later.

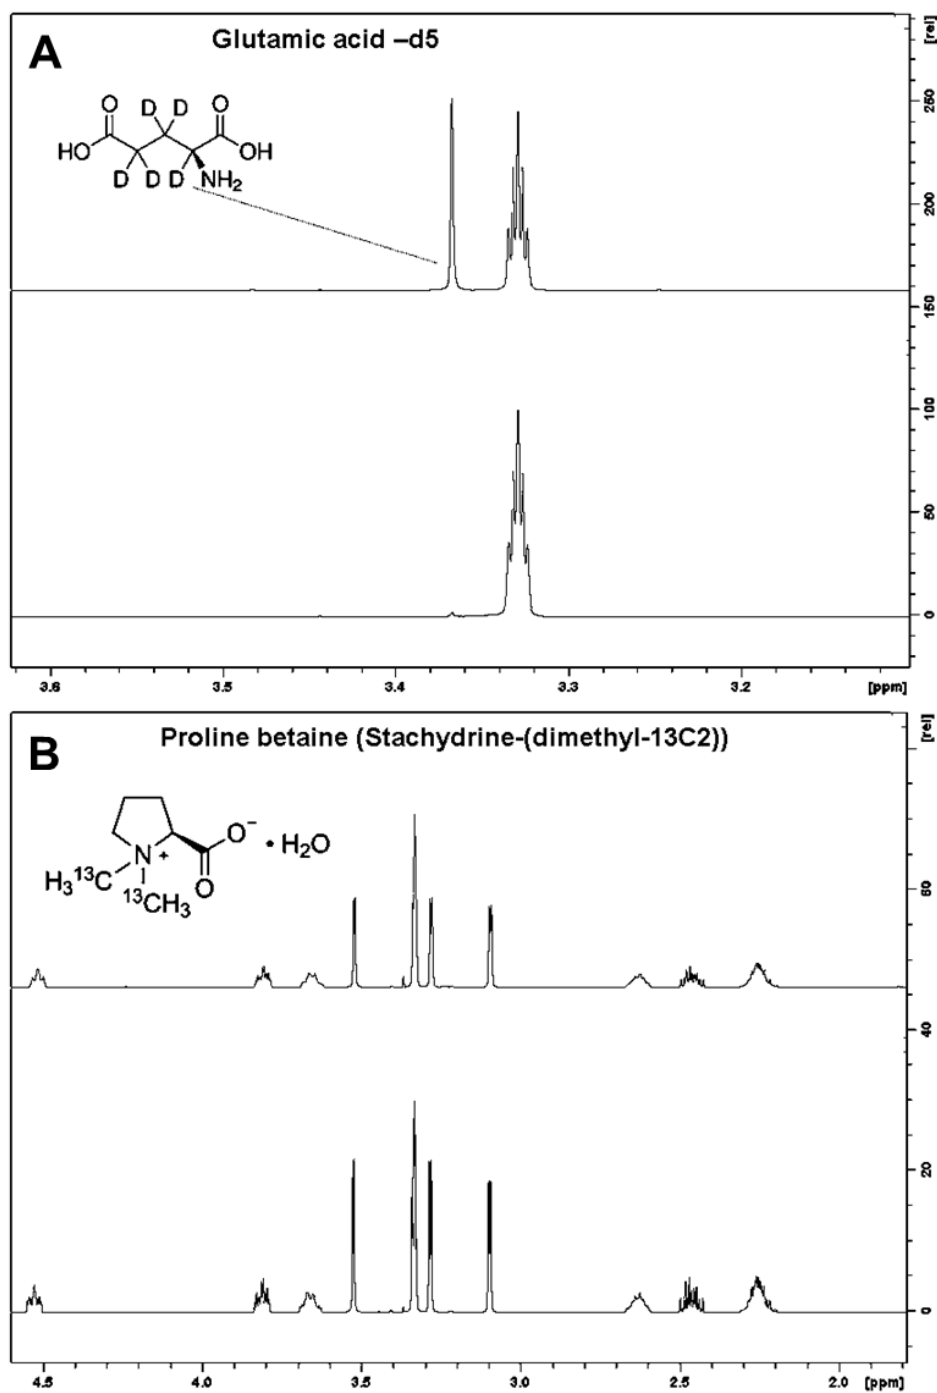

**Figure S-3.** MS/MS spectra obtained for the standards in neat methanol (A), spiked (B) and non-spiked pooled urine sample (C) from the INTERMAP study for glutamic acid and phenylacetylglutamine. The spectra were obtained by direct infusion in Resolution mode on the Waters Synapt G2-S (Q-ToF).

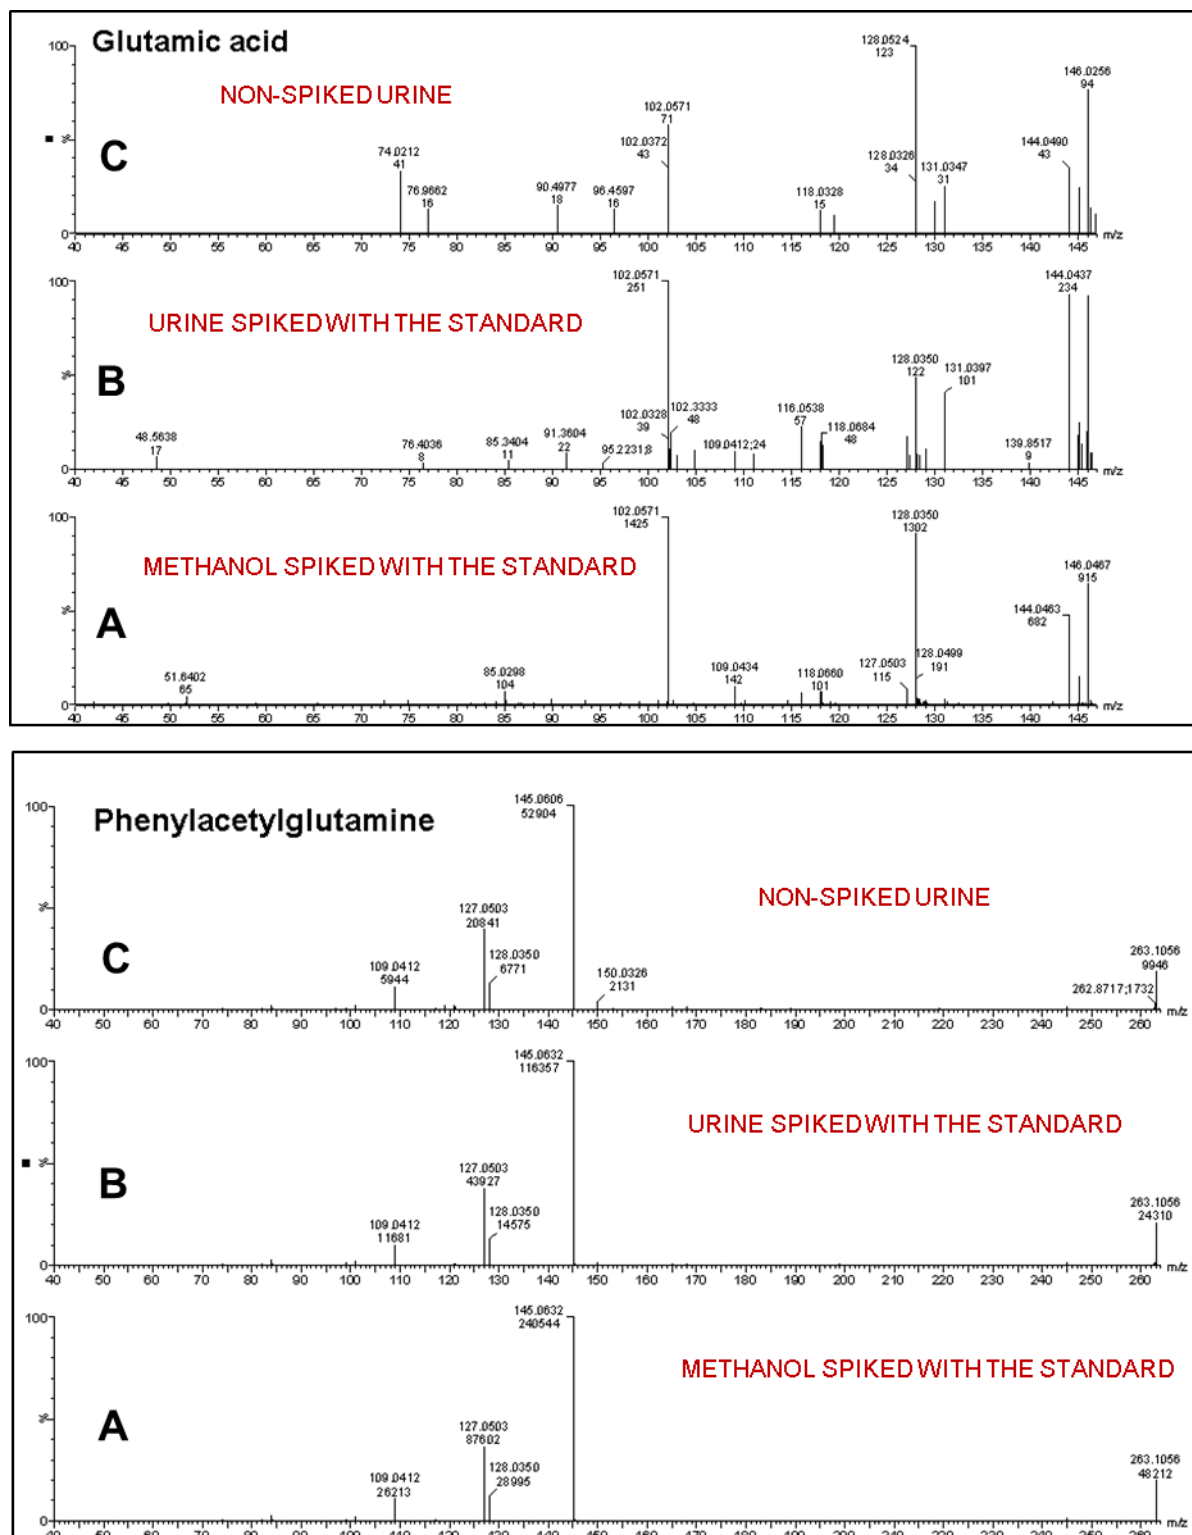

Figure S-4. The ratio of intensities of metabolites and internal standards at dilution 1/20 to dilution 1/50 in the pooled urine samples from the Japan (blue) and USA (red) INTERMAP populations. The ratios of intensities for stable isotope labelled standards are marked with an (\*).

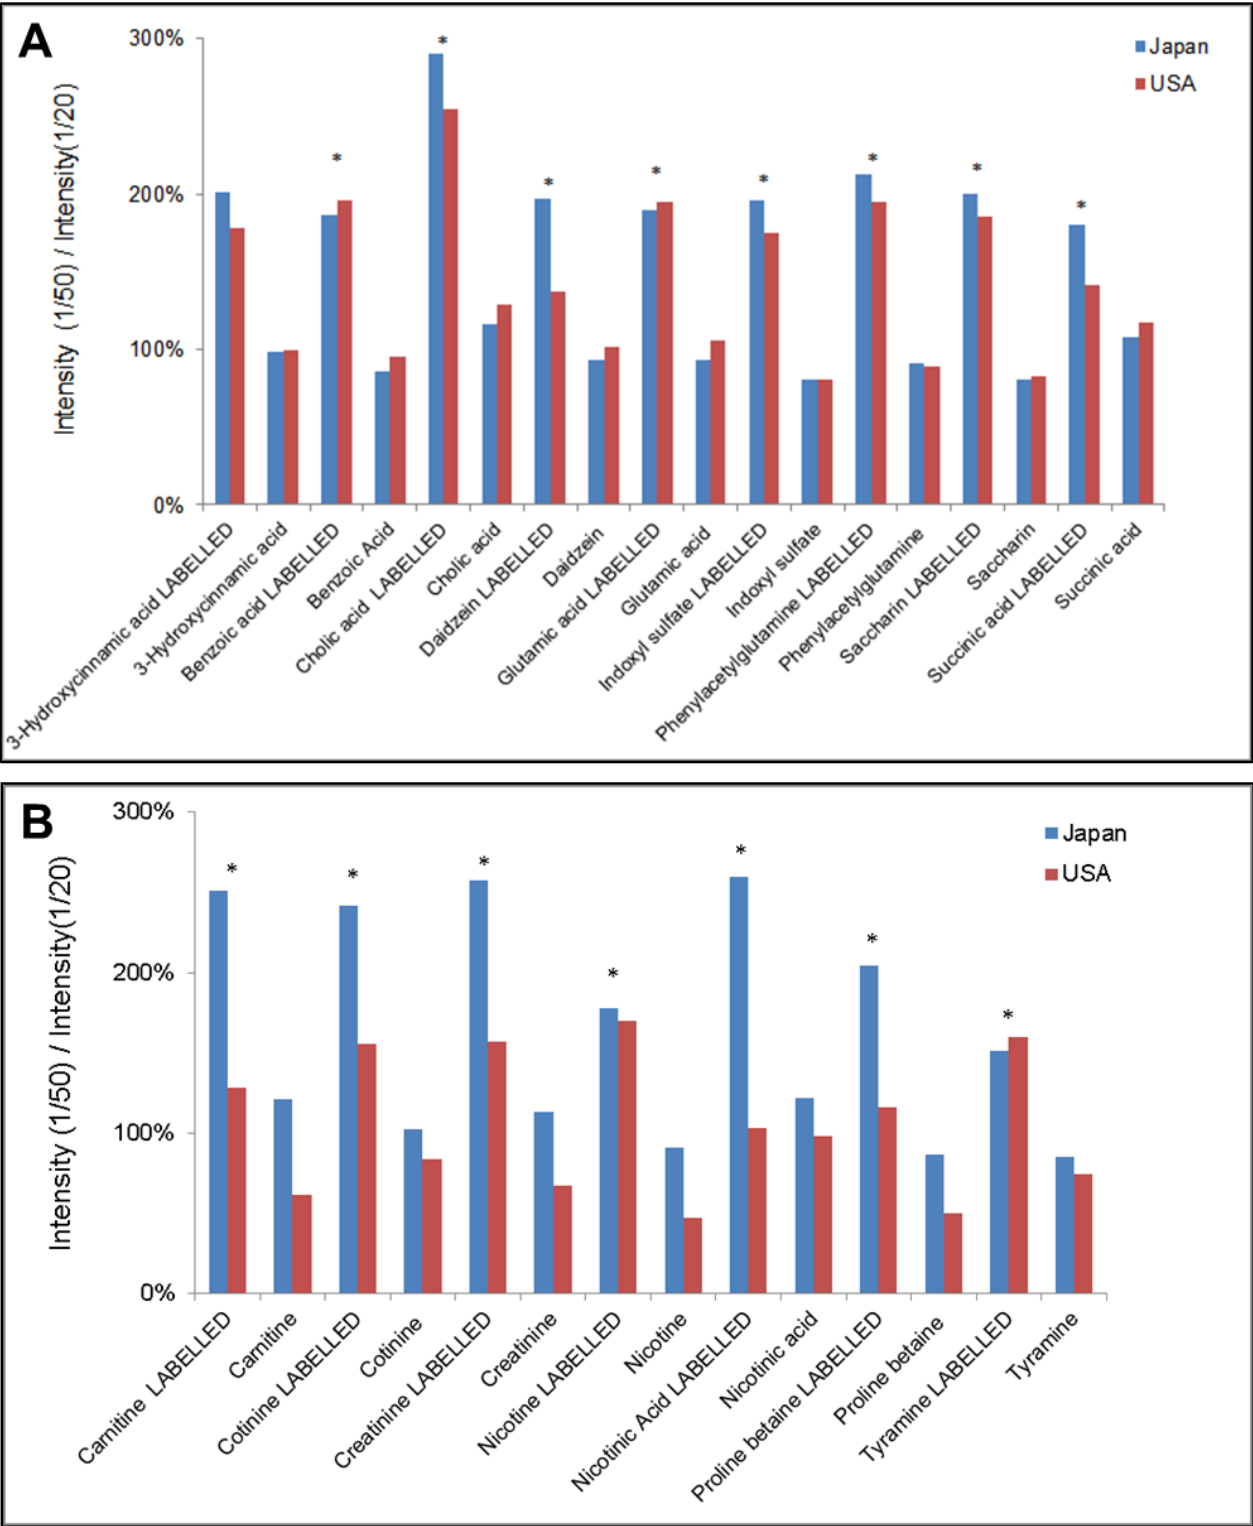

Figure S-5. Calibration curves obtained in pooled urine sample by the method of standard additions (open squares) and in analyte-free matrix (open circles) for cholic acid, hippuric acid, and creatinine. SIL – stable isotope labelled standard.

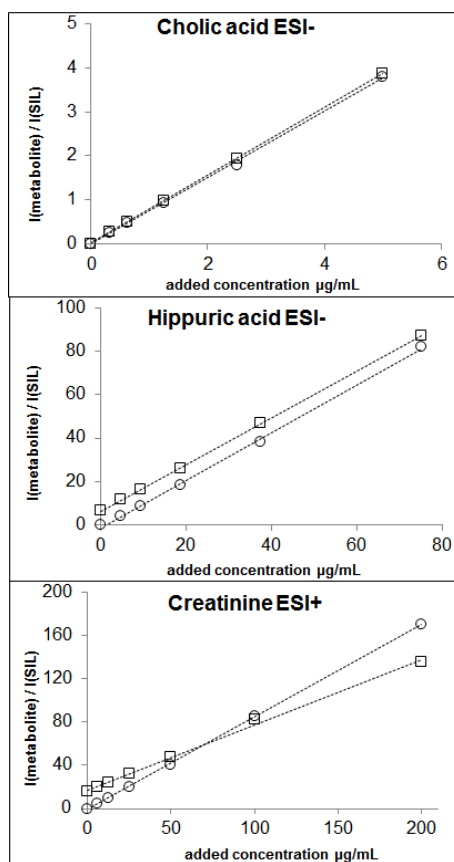

**Figure S-6. Precision (as CV %) of slope values and concentration of the QC samples for some metabolites measured in Japan-F pooled urine samples from three validation series prepared and measured to assess the assay stability (freshly prepared, three freeze-thaw cycles, long-term storage at -80°C).**

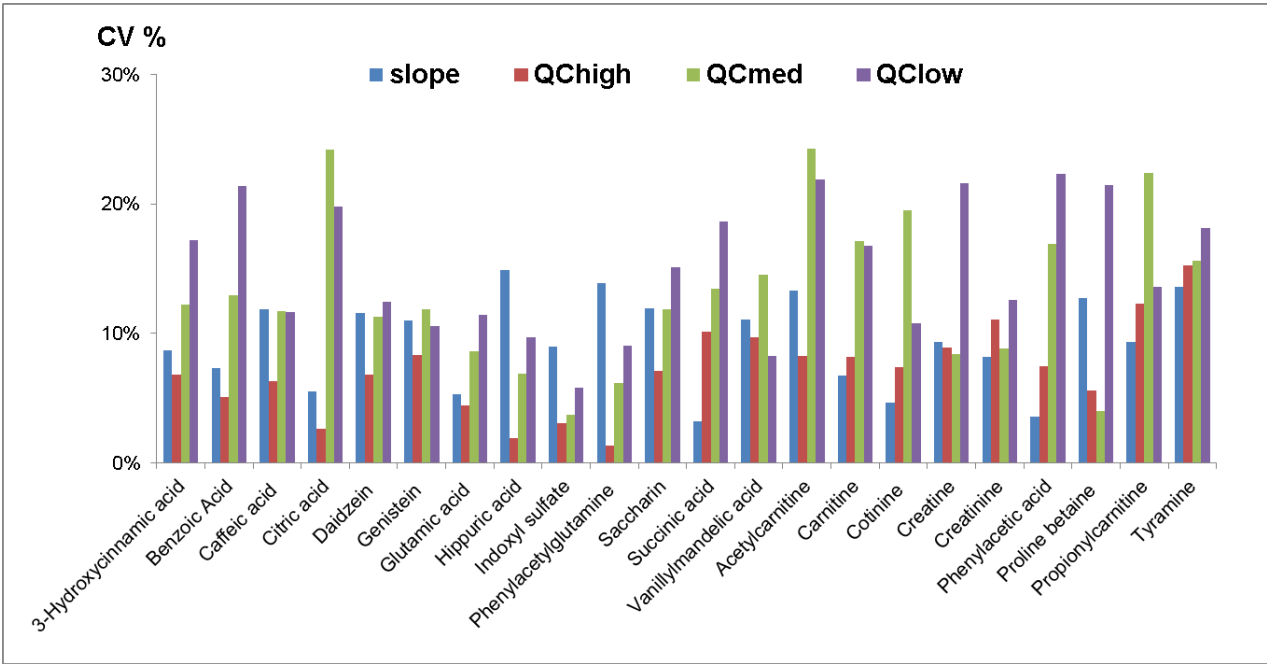

**Figure S-7.** Concentration values of nicotine (A), acetylcarnitine (B), and creatinine (C) measured in positive ion mode, and of caffeic acid (D), glutamic acid (E), and hippuric acid (F) measured in negative ion mode in the pooled SR samples in 11 batches from the USA-F population of the INTERMAP study. The straight lines represent the mean concentration  $\pm 2$  standard deviation.

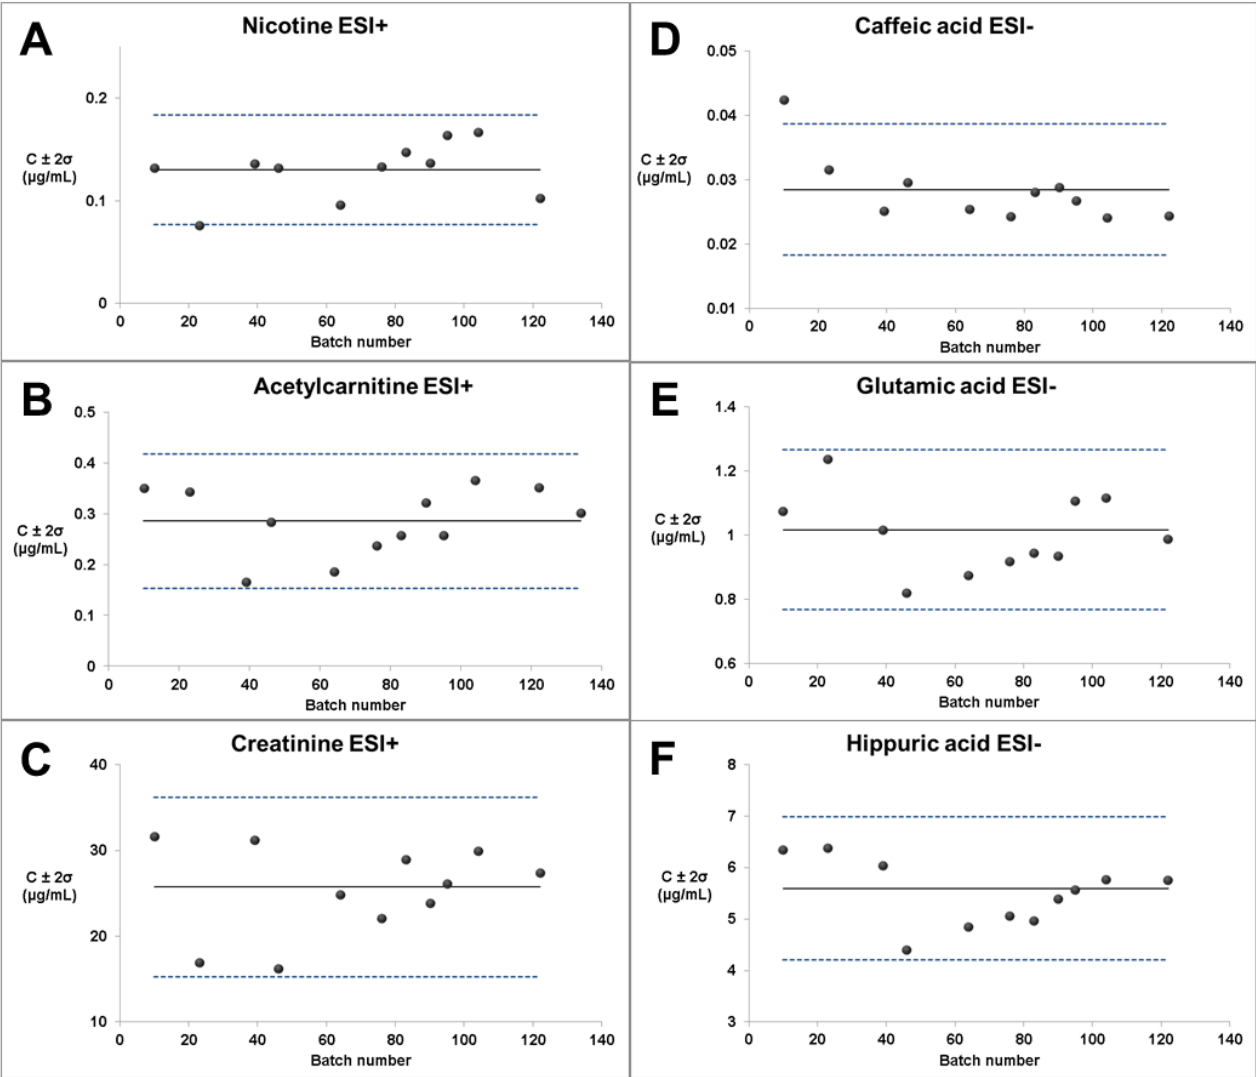

Figure S-8. OPLS-DA cross-validated score plots obtained for the full-scan global profile analysis of the QC samples from the USA-F and Japan-F populations from the INTERMAP study in negative (A) and positive (B) ion modes. The model characteristics are presented in the Figure.

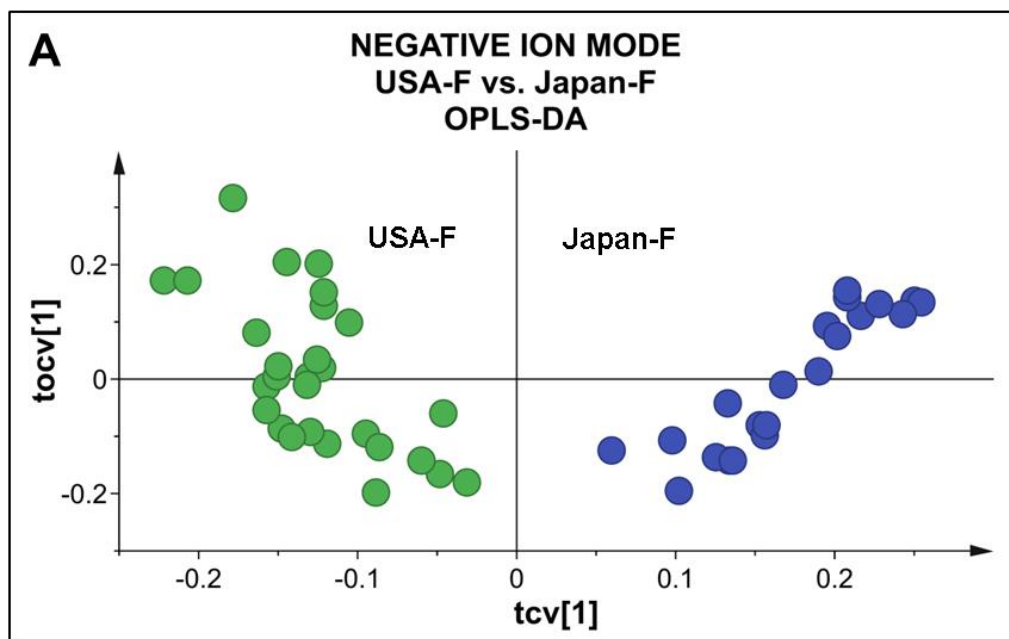

$R^2X=0.611$   $R^2Y=0.933$   $Q^2Y=0.908$

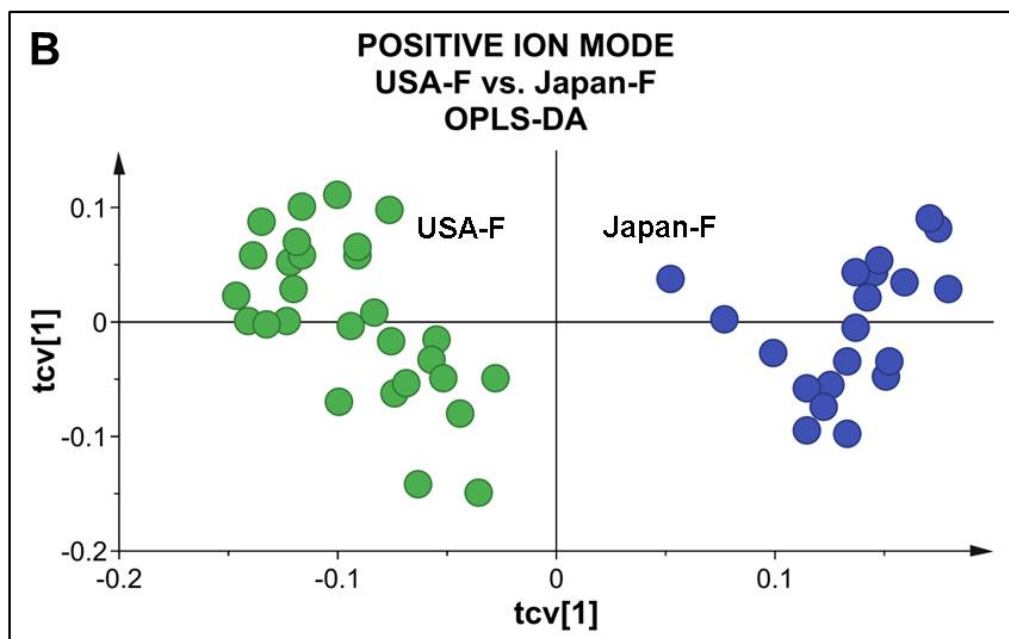

$R^2X=0.365$   $R^2Y=0.966$   $Q^2Y=0.921$

**Figure S-9. Test Mixture (TM) analysis: inter-day CV% (n=30) values for the intensities of compounds measured in negative ion mode and the effect of signal normalisation to the sum of intensities (A). CV% of normalised intensity values for the n=8 measurements done before and after the instrument maintenance (B).**

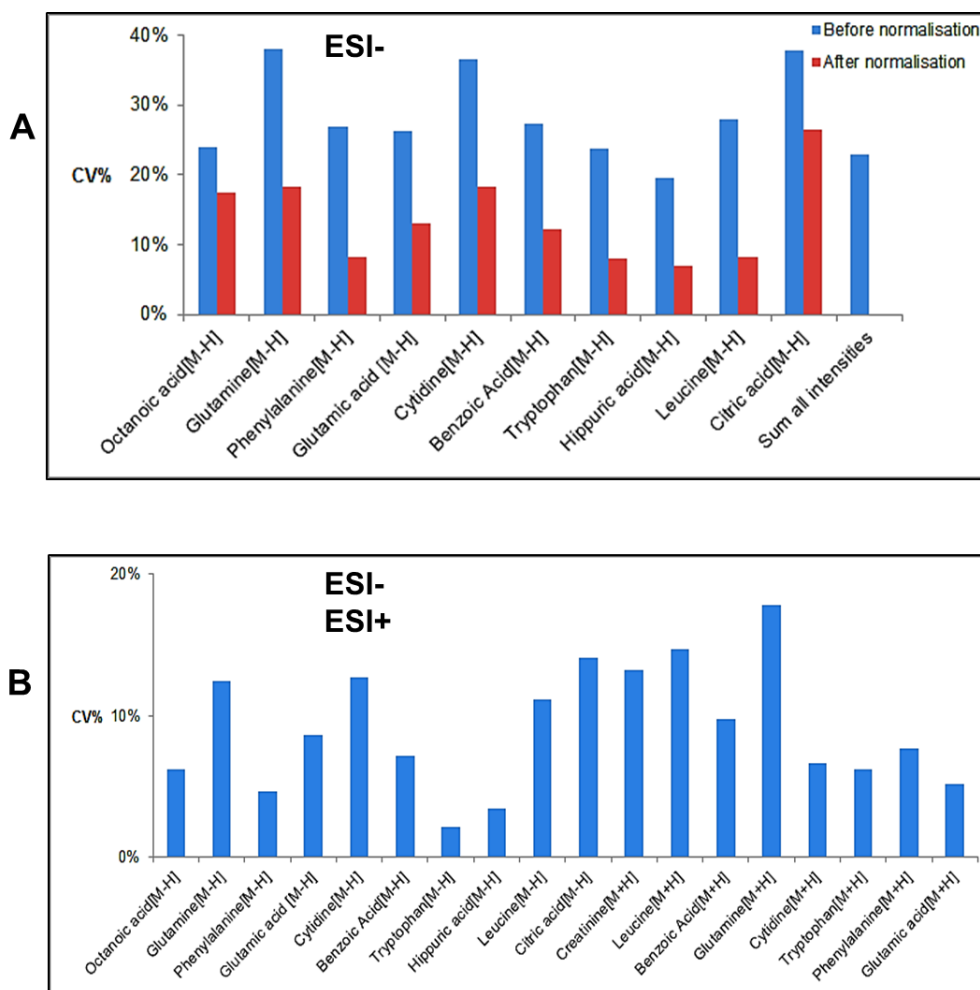

**Figure S-10. Box plots showing difference in population (Japan and USA) and gender metabolite concentration levels obtained from DI-nESI-HRMS by the standard addition method.**

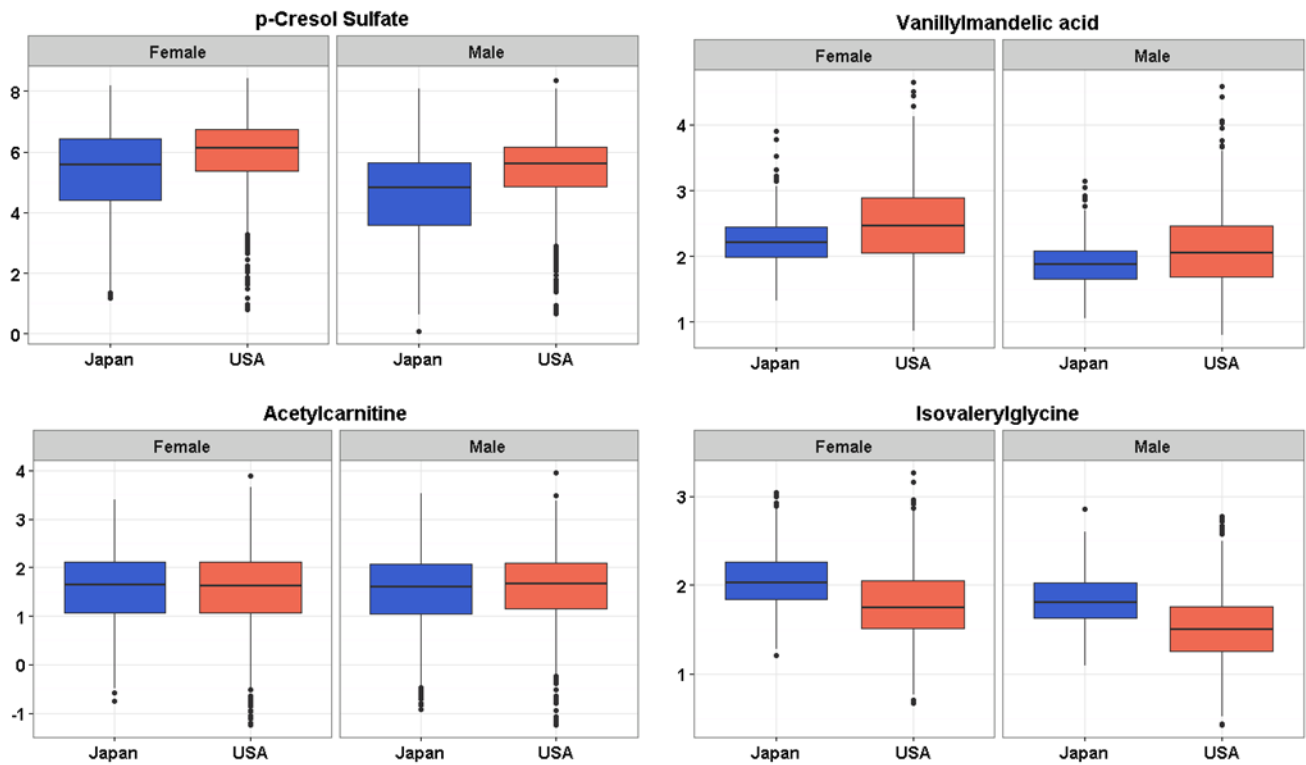

Figure S-11. OPLS-DA loadings S plots comparing features ( $m/z$ ) from the global profiles of urine samples from the USA and Japanese populations obtained by DI-nESI-HRMS method in positive (A) and negative (B) ionisation modes.

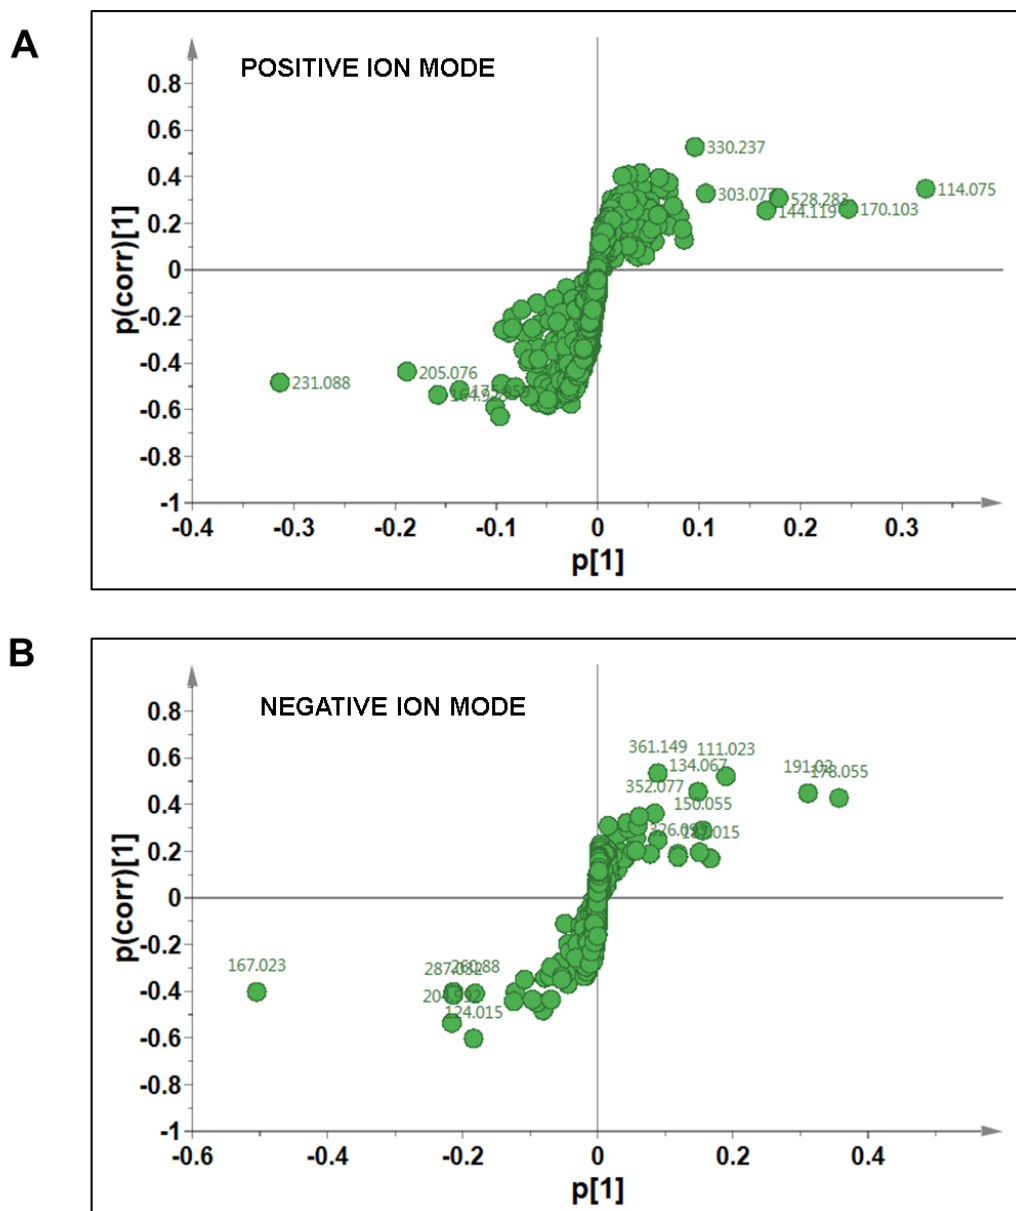

Figure S-12. MS/MS spectrum (CE=15eV) of the features  $m/z$  170.10 detected in positive ion mode. The fragmentation gave rise to the ions at  $m/z$  153.07,  $m/z$  141.07 (zoomed in),  $m/z$  126.10,  $m/z$  124.09,  $m/z$  109.07,  $m/z$  97.08,  $m/z$  96.07,  $m/z$  95.06, and  $m/z$  83.06.

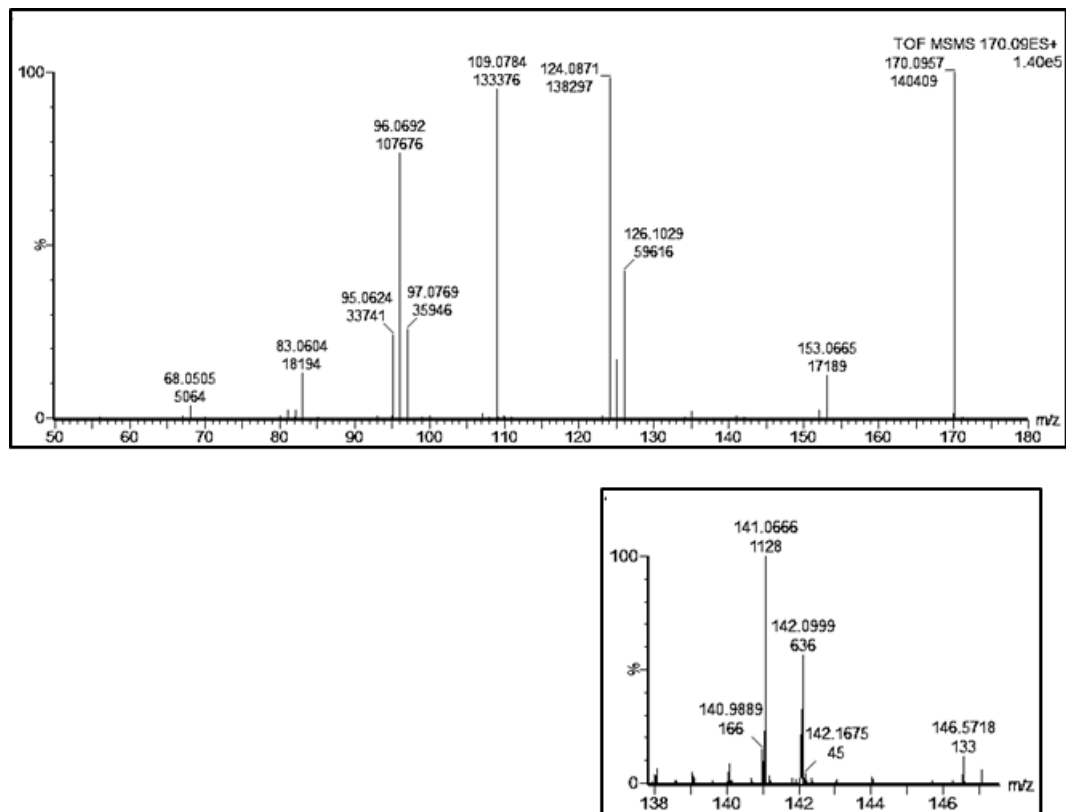

## Supplementary References

1. Stokvis, E.; Rosing, H.; Beijnen, J. H., Stable isotopically labeled internal standards in quantitative bioanalysis using liquid chromatography/mass spectrometry: necessity or not? *Rapid Communications in Mass Spectrometry* **2005**, *19* (3), 401-407.
2. Bouatra, S.; Aziat, F.; Mandal, R.; Guo, A. C.; Wilson, M. R.; Knox, C.; Bjorndahl, T. C.; Krishnamurthy, R.; Saleem, F.; Liu, P.; Dame, Z. T.; Poelzer, J.; Huynh, J.; Yallou, F. S.; Psychogios, N.; Dong, E.; Bogumil, R.; Roehring, C.; Wishart, D. S., The Human Urine Metabolome. *Plos One* **2013**, *8* (9), e73076, 1-28.
3. Smith, C. A.; O'Maille, G.; Want, E. J.; Qin, C.; Trauger, S. A.; Brandon, T. R.; Custodio, D. E.; Abagyan, R.; Siuzdak, G., METLIN - A metabolite mass spectral database. *Ther Drug Monit* **2005**, *27* (6), 747-751.
4. Berman, T.; Goldsmith, R.; Goen, T.; Spungen, J.; Novack, L.; Levine, H.; Amitai, Y.; Shohat, T.; Grotto, I., Urinary concentrations of environmental contaminants and phytoestrogens in adults in Israel. *Environ Int* **2013**, *59*, 478-484.
5. Sarkar, M.; Muhammad-Kah, R.; Liang, Q. W.; Kapur, S.; Feng, S. X.; Roethig, H., Evaluation of spot urine as an alternative to 24 h urine collection for determination of biomarkers of exposure to cigarette smoke in adult smokers. *Environ Toxicol Phar* **2013**, *36* (1), 108-114.
